# Supplementary material for: Brain profiling in murine colitis and human epilepsy reveals neutrophils and TNFα as mediators of neuronal hyperexcitability
Source: PubMed Central journal article supplement (PMC8436533; doi:10.1186/s12974-021-02262-4), 2021-09-12
Supplement: 12974_2021_2262_MOESM1_ESM.pdf [file 12974_2021_2262_MOESM1_ESM.pdf]

Cytokine (fold change)

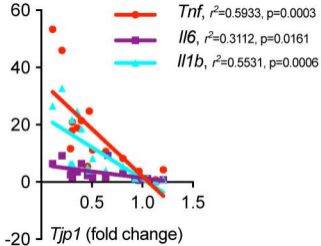

Cytokine (fold change)

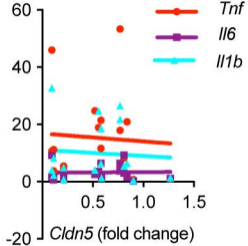

**a**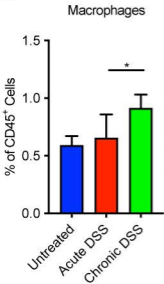**b**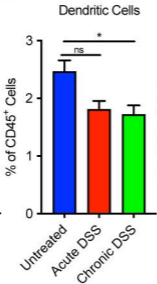**c**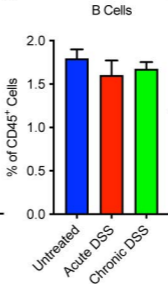**d**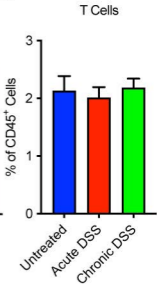

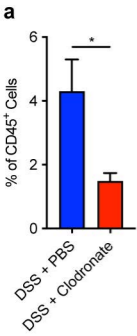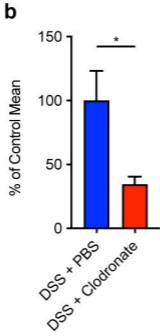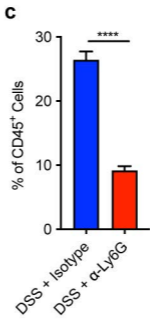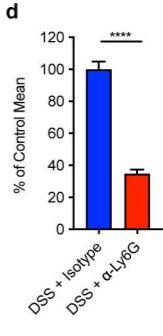

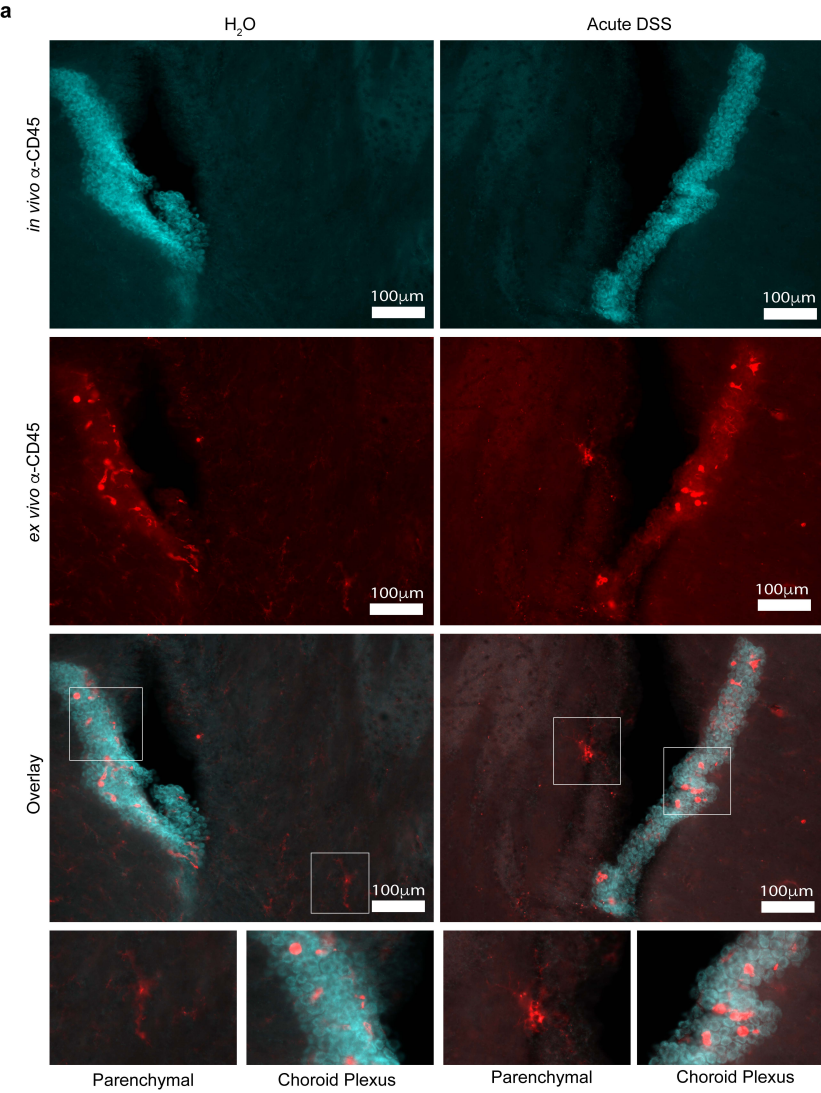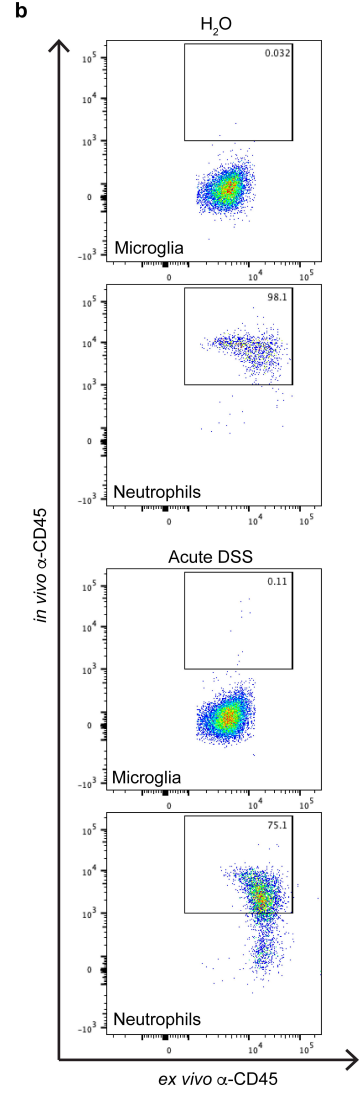

**Supplemental Table 1.** Complete list of genes that are significantly down- or up-regulated in hippocampal tissue from epileptic patients compared to controls.

| Downregulated Genes | p_value     | log2(fold change) | Upregulated Genes | p_value    | log2(fold change) |
|---------------------|-------------|-------------------|-------------------|------------|-------------------|
| TTR                 | 2.93E-05    | -8.380821784      | CCL3              | 2.93E-05   | 5.285439211       |
| SCGN                | 2.93E-05    | -3.058893689      | CH25H             | 2.93E-05   | 3.55741009        |
| CLIC6               | 2.97E-05    | -3.046921047      | TNF               | 2.93E-05   | 3.430419097       |
| FNDC1               | 2.93E-05    | -3.023269779      | IL1B              | 2.93E-05   | 3.264986734       |
| C11orf88            | 8.43E-05    | -2.795859283      | CCL2              | 2.93E-05   | 2.903423966       |
| CABP7               | 2.93E-05    | -2.708396442      | PTGS2             | 2.93E-05   | 2.897240426       |
| C9orf117            | 4.73E-05    | -2.689659879      | DHRS9             | 2.93E-05   | 2.847596102       |
| COL25A1             | 2.93E-05    | -2.662003536      | FOSB              | 2.95E-05   | 2.697106574       |
| DCDC1               | 2.94E-05    | -2.590744853      | XIST              | 0.03537679 | 2.647084213       |
| CABP7               | 2.93E-05    | -2.564904848      | CCL8              | 3.54E-05   | 2.628307006       |
| KLK1                | 6.75E-05    | -2.490050854      | TMEM233           | 2.93E-05   | 2.612352499       |
| DCDC1               | 2.94E-05    | -2.465938398      | MIR17HG           | 2.93E-05   | 2.557042415       |
| NTS                 | 0.000290431 | -2.457989644      | FREM3             | 4.98E-05   | 2.416839742       |
| FNDC1               | 3.11E-05    | -2.388355457      | GLI1              | 2.93E-05   | 2.308011315       |
| MCOLN3              | 2.93E-05    | -2.380821784      | PTGS2             | 2.93E-05   | 2.303050085       |
| C11orf88            | 0.0005547   | -2.351074441      | TMEM215           | 3.84E-05   | 2.242754922       |
| MAS1                | 2.93E-05    | -2.351074441      | NAT16             | 2.93E-05   | 2.180466161       |
| C6orf118            | 2.93E-05    | -2.336427665      | SEMA3A            | 2.98E-05   | 2.116697443       |
| FAM81B              | 0.000107459 | -2.321928095      | IL1RN             | 2.93E-05   | 2.034215715       |
| FAM183A             | 5.25E-05    | -2.314732593      | PPBP              | 0.0002205  | 2.032453537       |
| TSPAN18             | 2.95E-05    | -2.307572802      | SOCS3             | 3.22E-05   | 1.947853143       |
| STOML3              | 3.27E-05    | -2.293358943      | MCHR2             | 0.00806785 | 1.931683057       |
| SHISA6              | 2.94E-05    | -2.265344567      | CSF2RA            | 2.93E-05   | 1.918004519       |
| LINC00314           | 3.15E-05    | -2.258425153      | C1QL4             | 2.94E-05   | 1.910348915       |
| WNK4                | 2.95E-05    | -2.224317298      | SMYD1             | 0.001305   | 1.904965719       |
| DNAH11              | 2.94E-05    | -2.210896782      | MCHR2             | 0.00066639 | 1.900335509       |
| CHRNA1              | 2.93E-05    | -2.210896782      | SEMA3A            | 2.93E-05   | 1.898788797       |
| SHISA6              | 2.94E-05    | -2.204233052      | WISP1             | 2.93E-05   | 1.892973815       |
| ADRA1D              | 2.93E-05    | -2.204233052      | SMPX              | 0.00258729 | 1.891808001       |
| WIPF3               | 2.93E-05    | -2.204233052      | ANKRD22           | 0.00031849 | 1.871055075       |
| PRLR                | 3.39E-05    | -2.177881725      | FBXO40            | 0.00248285 | 1.860764203       |
| C9orf171            | 9.88E-05    | -2.171368418      | EGR2              | 2.93E-05   | 1.847596102       |
| CDRT15L2            | 3.01E-05    | -2.029146346      | ZFP36             | 8.43E-05   | 1.845188935       |
| CACNG8              | 2.93E-05    | -2.011587974      | IPCEF1            | 5.25E-05   | 1.834711216       |
| DNAI2               | 0.000349687 | -1.977099598      | TMEM159           | 2.95E-05   | 1.797843067       |
| SPAG17              | 3.15E-05    | -1.977099598      | FOXP2             | 3.39E-05   | 1.765959006       |
| EFCC1               | 2.93E-05    | -1.977099598      | SEMA3D            | 2.93E-05   | 1.763836459       |
| C4orf22             | 2.93E-05    | -1.965784285      | MKX               | 3.13E-05   | 1.746742716       |
| POSTN               | 4.51E-05    | -1.960159735      | IRAK2             | 2.93E-05   | 1.745452483       |
| KCNE1               | 2.93E-05    | -1.948975997      | CX3CR1            | 2.93E-05   | 1.744161096       |
| SHISA6              | 2.93E-05    | -1.943416472      | B3GNT5            | 2.93E-05   | 1.742437445       |
| ADGB                | 3.19E-05    | -1.899695094      | TNFRSF11A         | 4.05E-05   | 1.741574847       |
| BCL11B              | 2.93E-05    | -1.883635243      | KLHL1             | 0.00474318 | 1.740711733       |
| CHRNA1              | 3.08E-05    | -1.862496476      | THBS1             | 4.31E-05   | 1.737686761       |
| SPHKAP              | 2.93E-05    | -1.857259828      | DPP4              | 4.73E-05   | 1.691980751       |
| COL5A2              | 3.03E-05    | -1.852042119      | GPR6              | 0.01244972 | 1.689746438       |
| BHLHE22             | 2.94E-05    | -1.846843212      | AC004383.4        | 2.93E-05   | 1.685267407       |
| RP11-2E17.1         | 2.93E-05    | -1.831357964      | FOS               | 0.0002205  | 1.683471893       |
| PRKCG               | 2.93E-05    | -1.826232932      | C3                | 2.95E-05   | 1.644779219       |
| NTF3                | 2.93E-05    | -1.821126042      | ACY3              | 2.93E-05   | 1.63784206        |
| RGS14               | 2.93E-05    | -1.805912948      | SLC17A6           | 0.03987572 | 1.63691458        |
| SLC47A2             | 0.035376791 | -1.800877358      | HLA-DQA2          | 8.43E-05   | 1.631337144       |
| SAG                 | 9.12E-05    | -1.800877358      | TAC3              | 3.06E-05   | 1.629473197       |
| TNNT2               | 3.62E-05    | -1.790858602      | TAL1              | 2.93E-05   | 1.621524444       |
| COL5A2              | 2.97E-05    | -1.780908942      | SOD2              | 0.00020109 | 1.613531653       |
| COL2A1              | 2.99E-05    | -1.775959726      | BTG2              | 2.93E-05   | 1.60928218        |
| COL25A1             | 2.99E-05    | -1.775959726      | FPR1              | 3.03E-05   | 1.579662897       |
| NEUROD6             | 2.93E-05    | -1.756330919      | BCL2A1            | 0.00060839 | 1.573859222       |
| FBP2                | 3.84E-05    | -1.751465164      | GPR34             | 2.93E-05   | 1.573374526       |
| HPCA                | 2.93E-05    | -1.746615764      | OLR1              | 3.22E-05   | 1.572889668       |
| SMPD3               | 2.93E-05    | -1.74178261       | KLF6              | 2.95E-05   | 1.570462931       |
| SYNGAP1             | 2.93E-05    | -1.736965594      | FCAR              | 0.00016685 | 1.562669826       |
| SLC47A1             | 3.08E-05    | -1.727379545      | MMRN1             | 3.08E-05   | 1.554834396       |
| CLMP                | 2.93E-05    | -1.727379545      | RP11-191L9.4      | 0.00087605 | 1.537544572       |
| LINC00314           | 3.22E-05    | -1.722610301      | CYP4F2            | 2.94E-05   | 1.5360529         |
| SLC24A3             | 2.98E-05    | -1.713118852      | PAX2              | 0.0012496  | 1.5290713         |

|               |             |              |               |            |             |
|---------------|-------------|--------------|---------------|------------|-------------|
| CPLX2         | 2.93E-05    | -1.713118852 | SLN           | 0.00598002 | 1.525066592 |
| CCDC114       | 0.000349687 | -1.694321257 | SPTLC3        | 2.93E-05   | 1.522055749 |
| SLC24A3       | 3.11E-05    | -1.694321257 | RTP1          | 2.93E-05   | 1.519541905 |
| Downregulated | Upregulated |              |               |            |             |
| PPM1E         | 2.93E-05    | -1.685013515 | IKZF1         | 3.11E-05   | 1.516519498 |
| POSTN         | 5.25E-05    | -1.675765438 | FMN1          | 3.39E-05   | 1.508935662 |
| MCOLN3        | 2.93E-05    | -1.675765438 | APOC4         | 0.00046195 | 1.507414099 |
| CXXC11        | 3.01E-05    | -1.666576266 | HLA-DRA       | 0.00024196 | 1.504874589 |
| SPAG6         | 0.000107459 | -1.662003536 | CD53          | 2.93E-05   | 1.502839758 |
| SKA3          | 3.22E-05    | -1.662003536 | HPGDS         | 2.93E-05   | 1.496717988 |
| C9orf135      | 3.01E-05    | -1.652901329 | IER3          | 3.08E-05   | 1.496206666 |
| SPHKAP        | 2.94E-05    | -1.639354798 | RXFP1         | 0.00405021 | 1.491596594 |
| DNAI2         | 3.62E-05    | -1.634867407 | NMU           | 0.02435809 | 1.485426827 |
| ITGA8         | 2.93E-05    | -1.63039393  | ARHGAP36      | 0.00079975 | 1.475603745 |
| TEKT1         | 3.84E-05    | -1.621488377 | IPCEF1        | 9.12E-05   | 1.463099267 |
| CERKL         | 2.93E-05    | -1.60823228  | CBLN4         | 0.00079975 | 1.462575888 |
| SPHKAP        | 2.94E-05    | -1.603840511 | SYTL2         | 4.73E-05   | 1.46048047  |
| KIAA1257      | 2.93E-05    | -1.603840511 | PYDC2         | 0.00136518 | 1.454175893 |
| CDHR4         | 0.000461948 | -1.59946207  | SYTL2         | 4.14E-05   | 1.45206823  |
| TOMM34        | 2.93E-05    | -1.59946207  | CD84          | 2.98E-05   | 1.449957484 |
| CLSPN         | 2.96E-05    | -1.595096878 | RNU4ATAC      | 2.93E-05   | 1.449957484 |
| NRP1          | 2.96E-05    | -1.582079992 | CSF1R         | 2.94E-05   | 1.449429314 |
| RP11-408E5.5  | 9.12E-05    | -1.573466862 | RXFP1         | 0.00749242 | 1.446785562 |
| ALDH1A2       | 2.93E-05    | -1.573466862 | TINCR         | 6.75E-05   | 1.444136957 |
| CLMP          | 2.93E-05    | -1.569179503 | LAPTM5        | 2.96E-05   | 1.439357178 |
| CCNJL         | 2.93E-05    | -1.552156356 | RGS18         | 2.98E-05   | 1.430820497 |
| DCC           | 2.93E-05    | -1.543719518 | F2R           | 2.93E-05   | 1.42921423  |
| MYLK3         | 0.000290431 | -1.535331733 | VSIG4         | 3.98E-05   | 1.42867841  |
| CCDC108       | 7.80E-05    | -1.535331733 | CLEC7A        | 3.11E-05   | 1.427606173 |
| STC2          | 3.62E-05    | -1.535331733 | TLR7          | 2.97E-05   | 1.427606173 |
| CLDN2         | 0.000166853 | -1.531156057 | MPEG1         | 2.93E-05   | 1.426533138 |
| COL25A1       | 0.000107459 | -1.522840789 | HTR1D         | 0.00072996 | 1.419538892 |
| SMPD3         | 2.93E-05    | -1.522840789 | PNOC          | 0.00104668 | 1.41467678  |
| C1QTNF9       | 0.000290431 | -1.514573173 | TNIP3         | 8.43E-05   | 1.413594082 |
| CARTPT        | 0.000220502 | -1.514573173 | MYC           | 2.93E-05   | 1.412510571 |
| DNAH12        | 4.98E-05    | -1.506352666 | DONSON        | 2.93E-05   | 1.407080775 |
| NRP1          | 2.94E-05    | -1.498178735 | SUCNR1        | 0.00015222 | 1.404903122 |
| CNIH2         | 2.93E-05    | -1.498178735 | RP11-747H7.3  | 0.00024196 | 1.371280054 |
| FOXJ1         | 0.004384695 | -1.49410907  | MIR222        | 2.95E-05   | 1.366811773 |
| CAMK2A        | 2.93E-05    | -1.49410907  | IER2          | 3.06E-05   | 1.36232961  |
| ALDH1A2       | 2.95E-05    | -1.490050854 | CD83          | 2.93E-05   | 1.360083296 |
| SAMD3         | 2.95E-05    | -1.486004021 | NFKBID        | 3.54E-05   | 1.355580147 |
| FAM43A        | 2.93E-05    | -1.481968507 | ST6GAL1       | 2.93E-05   | 1.352758525 |
| AFF2          | 2.93E-05    | -1.477944251 | RP11-747H7.3  | 6.75E-05   | 1.352193538 |
| FEZF2         | 2.93E-05    | -1.473931188 | PRDM1         | 2.93E-05   | 1.34879896  |
| KIT           | 2.93E-05    | -1.469929258 | P2RY12        | 2.93E-05   | 1.347098671 |
| NLGN4Y        | 0.027655557 | -1.465938398 | AQP9          | 0.00136518 | 1.346531462 |
| SIPA1L3       | 2.93E-05    | -1.461958547 | RP11-747H7.3  | 0.0004217  | 1.345396375 |
| LDLRAD2       | 6.32E-05    | -1.457989644 | MEF2C         | 3.84E-05   | 1.343123519 |
| ONECUT2       | 2.94E-05    | -1.457989644 | C1QB          | 3.27E-05   | 1.341416524 |
| VWA5B1        | 0.000265126 | -1.454031631 | SCARA5        | 0.00066639 | 1.336283388 |
| DOC2B         | 2.93E-05    | -1.454031631 | SYK           | 2.93E-05   | 1.333423734 |
| SYNE1         | 2.93E-05    | -1.446148032 | AIF1          | 3.13E-05   | 1.332278283 |
| RP11-122F24.1 | 0.000303828 | -1.442222329 | ATF3          | 7.80E-05   | 1.331705216 |
| CAMK2A        | 2.93E-05    | -1.434402824 | EGR1          | 4.98E-05   | 1.331131922 |
| KCNIP2        | 2.93E-05    | -1.430508908 | RP11-150O12.1 | 4.73E-05   | 1.328262029 |
| SPATA18       | 2.97E-05    | -1.426625474 | C1QA          | 3.11E-05   | 1.328262029 |
| CHST8         | 2.93E-05    | -1.426625474 | WISP1         | 3.54E-05   | 1.326537348 |
| PRSS12        | 2.93E-05    | -1.422752464 | AC144521.1    | 0.00405021 | 1.323658291 |
| TOMM34        | 2.93E-05    | -1.422752464 | ALOX5AP       | 2.94E-05   | 1.319617934 |
| VEGFA         | 2.93E-05    | -1.422752464 | CYP4F3        | 0.00598002 | 1.317882883 |
| WIPF3         | 2.93E-05    | -1.415037499 | RGR           | 0.00029043 | 1.310921735 |
| KCNJ13        | 0.000201094 | -1.411195433 | C19orf77      | 0.00010746 | 1.30626224  |
| C9orf135      | 6.32E-05    | -1.411195433 | SATB2-AS1     | 0.00749242 | 1.305678743 |
| NEUROG2       | 3.84E-05    | -1.411195433 | ECHDC3        | 3.15E-05   | 1.303926836 |
| SYNGAP1       | 2.93E-05    | -1.411195433 | IRF8          | 2.96E-05   | 1.300416628 |
| ARMC3         | 0.00072996  | -1.407363571 | NUDT10        | 9.12E-05   | 1.299244658 |
| IKZF3         | 2.95E-05    | -1.407363571 | GAPT          | 9.12E-05   | 1.295135249 |
| NRIP3         | 2.93E-05    | -1.40354186  | TCAM1P        | 6.75E-05   | 1.294547234 |
| PRLR          | 3.15E-05    | -1.399730246 | STEAP1        | 0.00018314 | 1.293958979 |

|               |             |              |               |            |             |
|---------------|-------------|--------------|---------------|------------|-------------|
| SAMD3         | 2.94E-05    | -1.395928676 | TMEM196       | 0.00060839 | 1.292781749 |
| CHST8         | 2.94E-05    | -1.395928676 | OTOGL         | 0.00050599 | 1.292781749 |
| EPHA7         | 2.96E-05    | -1.388355457 | FOXP2         | 0.00024196 | 1.289244285 |
| WNK4          | 2.93E-05    | -1.388355457 | LINC00338     | 2.93E-05   | 1.288653864 |
| BHLHE22       | 2.93E-05    | -1.384583703 | GPR150        | 0.00210005 | 1.287472295 |
| CERKL         | 2.94E-05    | -1.380821784 | DPP10         | 3.57E-05   | 1.285698126 |
| C17orf72      | 2.93E-05    | -1.373327247 | FYB           | 2.95E-05   | 1.284514133 |
| PLXNA4        | 2.93E-05    | -1.373327247 | GADD45B       | 0.00013922 | 1.275603079 |
| ARHGGEF25     | 2.93E-05    | -1.373327247 | NR4A1         | 0.00269853 | 1.272620455 |
| WDR63         | 3.98E-05    | -1.365871442 | TLR7          | 3.98E-05   | 1.272620455 |
| VEPH1         | 2.93E-05    | -1.365871442 | GNB4          | 2.93E-05   | 1.271425676 |
| CHGB          | 2.93E-05    | -1.365871442 | CFB           | 2.93E-05   | 1.270229907 |
| CTB-52I2.8    | 2.93E-05    | -1.365871442 | TNFRSF10D     | 3.33E-05   | 1.269033146 |
| SEMA6B        | 2.93E-05    | -1.365871442 | DOCK8         | 3.27E-05   | 1.268434394 |
| HRK           | 2.93E-05    | -1.358453971 | TFEC          | 4.73E-05   | 1.266636643 |
| APOA2         | 6.75E-05    | -1.354759487 | SPINT1        | 4.51E-05   | 1.266636643 |
| TESC          | 2.93E-05    | -1.343732465 | ADORA3        | 4.31E-05   | 1.266636643 |
| BCL11B        | 2.93E-05    | -1.336427665 | SETD5         | 2.93E-05   | 1.264236151 |
| HTR1A         | 2.94E-05    | -1.329159664 | PTCHD1        | 2.93E-05   | 1.263034406 |
| NPTXR         | 2.95E-05    | -1.325539348 | OSM           | 3.13E-05   | 1.261229909 |
| CPLX2         | 2.93E-05    | -1.321928095 | PLCH1         | 2.93E-05   | 1.259423152 |
| DNAH8         | 2.93E-05    | -1.318325858 | AC005062.2    | 0.00029043 | 1.258820397 |
| GABRQ         | 0.008686065 | -1.311148256 | AC005062.2    | 0.00031849 | 1.25761413  |
| SMTNL2        | 4.51E-05    | -1.311148256 | 3/3/20        | 0.00050599 | 1.251567621 |
| NRIP3         | 3.08E-05    | -1.311148256 | C3            | 3.22E-05   | 1.24610401  |
| MTND2P32      | 2.93E-05    | -1.311148256 | FOXP2         | 6.32E-05   | 1.243669081 |
| PPP1R9B       | 2.93E-05    | -1.311148256 | TNFSF18       | 9.88E-05   | 1.243059706 |
| SHANK3        | 2.93E-05    | -1.311148256 | TMEM255A      | 2.97E-05   | 1.242450074 |
| PLXNA4        | 2.93E-05    | -1.307572802 | CXCL1         | 0.01160103 | 1.241230036 |
| TSPAN16       | 3.08E-05    | -1.304006187 | FOXP2         | 5.57E-05   | 1.240008965 |
| TG            | 3.13E-05    | -1.300448367 | C6orf141      | 0.00034969 | 1.238175419 |
| IRX3          | 0.013350486 | -1.2968993   | RP11-65F13.2  | 2.94E-05   | 1.236951759 |
| COL6A3        | 0.00228358  | -1.2968993   | SECTM1        | 3.11E-05   | 1.234501321 |
| CLPSL1        | 0.002482846 | -1.293358943 | SAMSN1        | 2.99E-05   | 1.23388806  |
| TNNT2         | 9.88E-05    | -1.293358943 | RORB          | 0.0002205  | 1.230203013 |
| SLC47A1       | 3.98E-05    | -1.289827252 | AC005062.2    | 0.00072996 | 1.22897257  |
| ARMC3         | 0.003447984 | -1.282789701 | OSTN          | 0.0005547  | 1.228356954 |
| NSMF          | 2.93E-05    | -1.282789701 | LINC00338     | 2.93E-05   | 1.227741076 |
| CCDC67        | 3.72E-05    | -1.275786313 | HTR2A         | 0.00868607 | 1.225891862 |
| RP11-85M11.2  | 2.93E-05    | -1.272297327 | C5orf63       | 2.93E-05   | 1.225891862 |
| PSD           | 2.93E-05    | -1.272297327 | PTCHD1        | 2.93E-05   | 1.224657734 |
| PTTG1         | 3.54E-05    | -1.268816758 | SIGLEC10      | 2.95E-05   | 1.222186307 |
| RP11-122F24.1 | 0.000505987 | -1.261880711 | SGK1          | 0.00013922 | 1.220949004 |
| METTL7B       | 0.000116923 | -1.261880711 | SDPR          | 9.88E-05   | 1.220329955 |
| C9orf16       | 2.93E-05    | -1.261880711 | SPATA20       | 0.0037383  | 1.218471211 |
| PTK2B         | 2.93E-05    | -1.261880711 | NUDT4         | 2.97E-05   | 1.218471211 |
| SPEF1         | 2.95E-05    | -1.258425153 | NCF2          | 3.72E-05   | 1.217851097 |
| NSMF          | 2.93E-05    | -1.258425153 | TINCR         | 4.14E-05   | 1.217230716 |
| PLXNA4        | 2.93E-05    | -1.258425153 | TMEM159       | 3.06E-05   | 1.215367972 |
| C1orf95       | 2.93E-05    | -1.254977851 | RP11-728F11.1 | 2.93E-05   | 1.21350282  |
| GRP           | 0.000241964 | -1.251538767 | NPY           | 2.96E-05   | 1.212880566 |
| DNAI2         | 3.54E-05    | -1.251538767 | TC2N          | 0.00060839 | 1.212258044 |
| RNSPO4        | 4.73E-05    | -1.248107862 | NFKBIZ        | 2.93E-05   | 1.211635253 |
| IBSP          | 3.39E-05    | -1.248107862 | CSGALNACT1    | 2.93E-05   | 1.210388864 |
| NRIP3         | 3.13E-05    | -1.248107862 | CD84          | 3.13E-05   | 1.206643224 |
| CACNG8        | 2.93E-05    | -1.248107862 | ADAM28        | 3.72E-05   | 1.206018004 |
| RBFOX1        | 2.93E-05    | -1.248107862 | HAVCR2        | 3.62E-05   | 1.205392513 |
| FAM189A1      | 2.93E-05    | -1.248107862 | ABCA6         | 3.84E-05   | 1.204140717 |
| NRP1          | 2.98E-05    | -1.244685096 | SV2C          | 0.00029043 | 1.202887833 |
| LZTS1         | 2.93E-05    | -1.244685096 | IER3          | 3.11E-05   | 1.202887833 |
| ZFPM2         | 2.93E-05    | -1.241270432 | IKZF1         | 2.93E-05   | 1.199750857 |
| FAM92B        | 0.001772074 | -1.23786383  | NCKAP1L       | 2.97E-05   | 1.199122642 |
| KIT           | 2.97E-05    | -1.234465254 | IGDCC4        | 4.98E-05   | 1.197236355 |
| ROPN1L        | 3.03E-05    | -1.231074664 | STMN1         | 2.94E-05   | 1.197236355 |
| KIAA1456      | 2.93E-05    | -1.227692025 | STRIP2        | 4.51E-05   | 1.195977459 |
| SIPA1L3       | 2.94E-05    | -1.224317298 | CASP1         | 2.93E-05   | 1.194717463 |
| NRP2          | 2.97E-05    | -1.220950447 | CBX3P2        | 2.96E-05   | 1.193456366 |
| KCNA1         | 2.93E-05    | -1.220950447 | RFX4          | 0.00011692 | 1.19093086  |
| RSPO3         | 2.93E-05    | -1.217591435 | CYBB          | 3.11E-05   | 1.19093086  |
| PRND          | 0.000384174 | -1.214240226 | M1AP          | 2.94E-05   | 1.189666447 |

|              |             |              |               |            |             |
|--------------|-------------|--------------|---------------|------------|-------------|
| SLC47A1      | 4.14E-05    | -1.214240226 | SEC24D        | 3.01E-05   | 1.188400925 |
| SBK1         | 2.93E-05    | -1.214240226 | TAGAP         | 3.03E-05   | 1.185866545 |
| BCAS4        | 2.93E-05    | -1.214240226 | PLA2G7        | 4.73E-05   | 1.184597684 |
| PLA2G4D      | 3.15E-05    | -1.210896782 | TTN           | 3.13E-05   | 1.184597684 |
| SLC26A10     | 2.93E-05    | -1.210896782 | IGSF6         | 2.99E-05   | 1.183962835 |
| NEFH         | 2.95E-05    | -1.204233052 | THEMIS        | 0.0012496  | 1.183327706 |
| WIPF3        | 2.93E-05    | -1.200912694 | CTD-2521M24.5 | 0.00050599 | 1.183327706 |
| GPR64        | 0.000876053 | -1.19759996  | EFNA5         | 0.00020109 | 1.183327706 |
| CACNA1I      | 2.93E-05    | -1.19759996  | NUDT10        | 5.57E-05   | 1.18142064  |
| TTC39C       | 2.93E-05    | -1.19759996  | IRAK3         | 3.13E-05   | 1.18142064  |
| MTUS2        | 2.93E-05    | -1.19759996  | HSPB3         | 0.00079975 | 1.178873958 |
| KCNAB2       | 2.93E-05    | -1.19759996  | THBS1         | 9.88E-05   | 1.176960992 |
| VGLL3        | 0.001143313 | -1.194294815 | FAP           | 2.94E-05   | 1.176322773 |
| DLGAP3       | 2.93E-05    | -1.194294815 | AC011242.6    | 2.93E-05   | 1.171847314 |
| ONECUT2      | 0.000666388 | -1.190997225 | RP11-792D21.2 | 0.00034969 | 1.171206827 |
| PTPRN2       | 2.93E-05    | -1.190997225 | PDZRN3        | 3.98E-05   | 1.171206827 |
| C1orf173     | 2.93E-05    | -1.190997225 | EMP1          | 0.00292929 | 1.168642036 |
| MDK          | 2.93E-05    | -1.190997225 | RGS10         | 3.22E-05   | 1.166715445 |
| NEUROD1      | 3.46E-05    | -1.181149439 | EPB41L4B      | 0.01244972 | 1.166072676 |
| GRIA1        | 2.94E-05    | -1.181149439 | NR4A3         | 0.00079975 | 1.164786278 |
| KCNAB1       | 2.93E-05    | -1.177881725 | ASXL3         | 3.01E-05   | 1.164142649 |
| SPAG8        | 0.000505987 | -1.174621396 | TMEM156       | 0.00013922 | 1.162854528 |
| ADCY9        | 2.93E-05    | -1.168122759 | SNTB2         | 2.96E-05   | 1.161565256 |
| SUSD4        | 3.04E-05    | -1.164884385 | ADORA3        | 3.27E-05   | 1.159629186 |
| SYNE1        | 2.93E-05    | -1.164884385 | ALOX5AP       | 3.33E-05   | 1.157690514 |
| STXBPL5L     | 2.93E-05    | -1.164884385 | ADAD2         | 0.00269853 | 1.155101558 |
| TOMM34       | 2.93E-05    | -1.161653263 | CLDN10        | 2.94E-05   | 1.155101558 |
| COL24A1      | 7.80E-05    | -1.158429363 | PLCH1         | 2.93E-05   | 1.153805336 |
| NEURL1B      | 2.94E-05    | -1.158429363 | PLEKHF2       | 2.93E-05   | 1.153156788 |
| ALPK1        | 3.62E-05    | -1.152003093 | PAH           | 3.27E-05   | 1.152507948 |
| RIN1         | 2.96E-05    | -1.152003093 | KBTBD8        | 2.93E-05   | 1.152507948 |
| EPB41L4A     | 2.95E-05    | -1.152003093 | HLA-DRB5      | 0.0004217  | 1.151858817 |
| ARHGEF25     | 2.93E-05    | -1.152003093 | HLA-DRB1      | 5.25E-05   | 1.151209393 |
| GRIN1        | 2.93E-05    | -1.152003093 | MSR1          | 4.98E-05   | 1.151209393 |
| PKP2         | 3.01E-05    | -1.148800661 | CYS1          | 2.96E-05   | 1.149909668 |
| CACNA1H      | 2.96E-05    | -1.148800661 | APBB1IP       | 4.51E-05   | 1.147957881 |
| TNFRSF25     | 2.93E-05    | -1.148800661 | GADD45G       | 0.00149036 | 1.146655222 |
| HCN2         | 2.93E-05    | -1.148800661 | PHYHIPL       | 2.93E-05   | 1.145351386 |
| PTTG2        | 2.93E-05    | -1.142417045 | GRIK3         | 7.24E-05   | 1.144699025 |
| SLC25A23     | 2.93E-05    | -1.142417045 | SLC7A7        | 3.13E-05   | 1.143393419 |
| CCDC64       | 2.93E-05    | -1.142417045 | IL6ST         | 2.93E-05   | 1.143393419 |
| CELF3        | 2.93E-05    | -1.142417045 | AP3B1         | 2.93E-05   | 1.142740172 |
| ARHGAP44     | 2.93E-05    | -1.142417045 | MCL1          | 2.97E-05   | 1.14208663  |
| WASL         | 2.93E-05    | -1.139235797 | CLEC9A        | 0.00020109 | 1.139469495 |
| DNAAF1       | 2.97E-05    | -1.13606155  | EIF4E         | 0.02435809 | 1.13553487  |
| NDUFA13      | 2.93E-05    | -1.13606155  | SASH3         | 2.96E-05   | 1.134878054 |
| EHF          | 2.96E-05    | -1.13289427  | CBLN4         | 0.0037383  | 1.133563526 |
| ATP2B3       | 2.93E-05    | -1.13289427  | LILRB4        | 0.00066639 | 1.133563526 |
| NCS1         | 2.93E-05    | -1.13289427  | TREM2         | 0.00013922 | 1.133563526 |
| ADD2         | 2.93E-05    | -1.13289427  | ST6GAL2       | 2.95E-05   | 1.133563526 |
| LRRC71       | 3.04E-05    | -1.12973393  | FOXP2         | 3.39E-05   | 1.132247798 |
| MEG3         | 3.27E-05    | -1.123433941 | GULP1         | 0.00066639 | 1.130271955 |
| RP11-55418.2 | 0.000265126 | -1.120294234 | CBLN1         | 0.0005547  | 1.130271955 |
| HAPLN4       | 0.000220502 | -1.120294234 | ART3          | 3.33E-05   | 1.130271955 |
| DNAH11       | 4.14E-05    | -1.120294234 | NEURL3        | 2.93E-05   | 1.130271955 |
| UNC13A       | 2.96E-05    | -1.120294234 | KLF6          | 2.93E-05   | 1.128293401 |
| SPRED3       | 2.93E-05    | -1.117161344 | TLR2          | 0.00015222 | 1.12763328  |
| ATP2B3       | 2.93E-05    | -1.117161344 | ZC3H12A       | 7.24E-05   | 1.126972856 |
| SYT5         | 2.93E-05    | -1.117161344 | CD69          | 0.00046195 | 1.12631213  |
| NDUFA4L2     | 2.93E-05    | -1.117161344 | TMEM56        | 3.33E-05   | 1.12631213  |
| PRKCA        | 2.93E-05    | -1.114035243 | ARSJ          | 3.08E-05   | 1.12498977  |
| RASSF9       | 0.001249602 | -1.110915901 | RORB          | 0.00016685 | 1.122341408 |
| CXorf27      | 2.99E-05    | -1.10780329  | CRYBA1        | 2.98E-05   | 1.121015401 |
| LRRC46       | 2.98E-05    | -1.10780329  | DRD1          | 0.00192956 | 1.12035194  |
| TTC40        | 2.93E-05    | -1.10780329  | GEM           | 0.00095782 | 1.12035194  |
| TMCC2        | 2.93E-05    | -1.10780329  | RP11-792D21.2 | 0.00087605 | 1.117695043 |
| LRRC4B       | 2.93E-05    | -1.10780329  | C2CD4B        | 0.03131526 | 1.113033665 |
| DLG3         | 2.93E-05    | -1.10780329  | CYTL1         | 7.24E-05   | 1.110363243 |
| ALPK1        | 0.000127607 | -1.104697379 | TMEM107       | 2.93E-05   | 1.110363243 |
| HYDIN        | 4.98E-05    | -1.104697379 | ATF3          | 0.00114331 | 1.109694865 |



|               |             |              |            |            |             |
|---------------|-------------|--------------|------------|------------|-------------|
| CTNNA2        | 2.96E-05    | -1.104697379 | ATP10A     | 0.00012761 | 1.109694865 |
| SLC45A4       | 2.93E-05    | -1.104697379 | TDRD6      | 3.46E-05   | 1.109694865 |
| C16orf46      | 2.93E-05    | -1.104697379 | SATB2      | 0.00474318 | 1.109026176 |
| RP11-122F24.1 | 3.46E-05    | -1.10159814  | CNTN4      | 0.00405021 | 1.108357178 |
| TDRD9         | 3.08E-05    | -1.10159814  | GRASP      | 3.22E-05   | 1.108357178 |
| LINC00683     | 3.06E-05    | -1.10159814  | AQP4       | 5.25E-05   | 1.10701825  |
| SLC26A10      | 2.93E-05    | -1.10159814  | C6orf141   | 0.00087605 | 1.105678078 |
| GRIN1         | 2.93E-05    | -1.10159814  | RAB32      | 2.93E-05   | 1.105678078 |
| CENPT         | 2.93E-05    | -1.10159814  | CXorf21    | 3.04E-05   | 1.10433666  |
| GPR64         | 0.037571178 | -1.098505545 | C17orf96   | 0.0043847  | 1.103665483 |
| KCNIP2        | 2.97E-05    | -1.098505545 | ZFP42      | 0.01430577 | 1.102993993 |
| MCTP2         | 2.97E-05    | -1.098505545 | TRIM38     | 3.84E-05   | 1.102993993 |
| TMEM120B      | 2.93E-05    | -1.098505545 | PDLIM3     | 3.54E-05   | 1.101650076 |
| SLC22A7       | 0.000166853 | -1.095419565 | DOCK2      | 3.27E-05   | 1.101650076 |
| PRKCE         | 2.93E-05    | -1.095419565 | EPHA3      | 0.00104668 | 1.100304906 |
| PDZD4         | 2.93E-05    | -1.095419565 | SOX6       | 2.93E-05   | 1.100304906 |
| EFR3B         | 2.93E-05    | -1.095419565 | ADAMTS9    | 7.80E-05   | 1.09963185  |
| GIT1          | 2.93E-05    | -1.095419565 | GLP2R      | 0.0002205  | 1.098284796 |
| KIT           | 3.62E-05    | -1.092340172 | HRH1       | 2.94E-05   | 1.097610797 |
| SLC25A23      | 2.93E-05    | -1.092340172 | ST6GAL2    | 2.93E-05   | 1.096936483 |
| FKBP5         | 0.037571178 | -1.089267338 | HK2        | 0.00052899 | 1.096261853 |
| CSDC2         | 2.97E-05    | -1.089267338 | RCN1       | 3.54E-05   | 1.096261853 |
| SLC25A23      | 2.93E-05    | -1.089267338 | MYO5C      | 3.03E-05   | 1.096261853 |
| MEG3          | 2.93E-05    | -1.089267338 | TRIM22     | 3.11E-05   | 1.093560176 |
| PLXNA4        | 3.19E-05    | -1.086201035 | ADAMTSL3   | 3.06E-05   | 1.092883966 |
| SHANK1        | 2.98E-05    | -1.086201035 | AOAH       | 2.93E-05   | 1.091530593 |
| ITGA4         | 2.93E-05    | -1.086201035 | MEPE       | 0.00104668 | 1.09085343  |
| NEK2          | 0.000799754 | -1.083141235 | STXBP5-AS1 | 0.00034969 | 1.09085343  |
| CLSTN2        | 2.97E-05    | -1.083141235 | L3MBTL4    | 2.93E-05   | 1.087462841 |
| GABRQ         | 0.003447984 | -1.080087911 | TLR4       | 2.95E-05   | 1.086104371 |
| PIH1D3        | 0.001365182 | -1.080087911 | MMP3       | 0.00060839 | 1.084744621 |
| RESP18        | 0.000957819 | -1.080087911 | DRAXIN     | 0.00010746 | 1.084744621 |
| KSR2          | 2.93E-05    | -1.080087911 | TRIM22     | 2.96E-05   | 1.084744621 |
| SHANK2        | 2.93E-05    | -1.077041036 | CD33       | 6.32E-05   | 1.083383588 |
| ESCO2         | 8.43E-05    | -1.074000581 | HRH1       | 3.84E-05   | 1.082021269 |
| C9orf117      | 3.03E-05    | -1.074000581 | CPNE5      | 0.00034969 | 1.081339627 |
| CTC-336P14.1  | 0.037571178 | -1.070966521 | MPP7       | 0.00749242 | 1.080657663 |
| JPH1          | 2.93E-05    | -1.070966521 | ADRB2      | 2.93E-05   | 1.079292767 |
| PRLR          | 0.008686065 | -1.067938829 | WEE1       | 2.98E-05   | 1.078609935 |
| RSPH4A        | 3.39E-05    | -1.064917477 | CDNF       | 4.14E-05   | 1.077926579 |
| MDGA1         | 3.08E-05    | -1.064917477 | PRKD3      | 3.27E-05   | 1.077242999 |
| BTNL9         | 5.93E-05    | -1.061902439 | TNC        | 0.03131526 | 1.075874867 |
| VSTM1         | 2.94E-05    | -1.061902439 | CD86       | 3.15E-05   | 1.075874867 |
| SDK1          | 2.93E-05    | -1.061902439 | SPARCL1    | 2.94E-05   | 1.073134705 |
| EHF           | 3.54E-05    | -1.058893689 | FAM83D     | 7.80E-05   | 1.071076162 |
| RAB3D         | 2.93E-05    | -1.058893689 | DLEU1      | 4.31E-05   | 1.069702167 |
| PRB4          | 0.000183144 | -1.055891201 | CDH13      | 0.00474318 | 1.069014678 |
| TNFAIP8L3     | 2.94E-05    | -1.055891201 | RGS6       | 0.00020109 | 1.069014678 |
| MCF2L         | 2.93E-05    | -1.055891201 | SIGLEC14   | 0.00292929 | 1.065572312 |
| ADRA1A        | 0.000349687 | -1.052894948 | RGS6       | 0.00060839 | 1.065572312 |
| FZD7          | 0.000116923 | -1.052894948 | TAGAP      | 3.13E-05   | 1.064882852 |
| MSC           | 3.03E-05    | -1.049904906 | HSD17B11   | 2.93E-05   | 1.063502942 |
| COL5A2        | 0.000666388 | -1.046921047 | LINC00324  | 2.94E-05   | 1.062121712 |
| SUSD4         | 3.04E-05    | -1.043943348 | S100A9     | 0.04751155 | 1.060739158 |
| PVALB         | 0.006954243 | -1.040971781 | TMEM132D   | 0.00598002 | 1.059355278 |
| RSPO3         | 0.000152218 | -1.040971781 | LAPTM5     | 3.03E-05   | 1.059355278 |
| INS-IGF2      | 0.000421702 | -1.038006323 | OR2L13     | 0.00405021 | 1.057970069 |
| NEUROD2       | 2.95E-05    | -1.038006323 | PPM1B      | 2.93E-05   | 1.057970069 |
| SYNPO         | 2.93E-05    | -1.038006323 | RRAD       | 0.00695424 | 1.057276965 |
| SYNPO         | 2.93E-05    | -1.038006323 | LIFR       | 2.95E-05   | 1.055889758 |
| INADL         | 2.93E-05    | -1.038006323 | AMIGO2     | 2.97E-05   | 1.055195654 |
| CATSPERD      | 0.001625989 | -1.035046947 | BDKRB2     | 7.80E-05   | 1.048933645 |
| PAGE4         | 0.000799754 | -1.035046947 | OTUD1      | 2.93E-05   | 1.048933645 |
| PCDH20        | 0.000241964 | -1.035046947 | IL33       | 3.04E-05   | 1.047538389 |
| SAMD14        | 2.93E-05    | -1.035046947 | SLC1A3     | 2.96E-05   | 1.047538389 |
| KCTD13        | 2.93E-05    | -1.035046947 | KDM6A      | 2.93E-05   | 1.047538389 |
| ZFX2          | 2.93E-05    | -1.035046947 | CHRNA3     | 0.00104668 | 1.046840254 |
| IQSEC3        | 2.93E-05    | -1.032093363 | FXYD6      | 3.15E-05   | 1.046840254 |
| FOLR1         | 0.000290431 | -1.029146346 | SFMBT2     | 2.93E-05   | 1.046840254 |
| SEZ6L         | 2.93E-05    | -1.029146346 | IL25       | 0.00026513 | 1.044044333 |

|            |             |              |              |             |             |
|------------|-------------|--------------|--------------|-------------|-------------|
| CAMK2B     | 2.97E-05    | -1.02620507  | ROPN1B       | 5.25E-05    | 1.04194383  |
| TMEM2      | 2.93E-05    | -1.02620507  | GBP1         | 7.80E-05    | 1.041242982 |
| HUNK       | 2.93E-05    | -1.02620507  | SLC44A3      | 4.73E-05    | 1.040541794 |
| CCDC60     | 7.80E-05    | -1.020340448 | GCNT4        | 0.00104668  | 1.039138394 |
| EPHA4      | 2.96E-05    | -1.020340448 | SCIN         | 0.00598002  | 1.038436182 |
| STX1B      | 2.93E-05    | -1.020340448 | SLC7A11      | 2.93E-05    | 1.038436182 |
| AC145110.1 | 0.000957819 | -1.017417053 | PRR16        | 2.93E-05    | 1.036327492 |
| SYNE1      | 2.97E-05    | -1.017417053 | STXBP5-AS1   | 0.00177207  | 1.03562391  |
| SH3RF1     | 2.96E-05    | -1.017417053 | TNFAIP8L2    | 2.95E-05    | 1.03562391  |
| AC004540.5 | 2.93E-05    | -1.017417053 | NFKBIA       | 9.12E-05    | 1.034215715 |
| NRP1       | 2.93E-05    | -1.017417053 | RIMS3        | 0.01160103  | 1.033511102 |
| CTXN3      | 0.010802019 | -1.01449957  | PPAP2B       | 3.03E-05    | 1.033511102 |
| SNAI3-AS1  | 2.94E-05    | -1.01449957  | DPP10        | 2.93E-05    | 1.033511102 |
| NCDN       | 2.93E-05    | -1.01449957  | ZCCHC6       | 2.93E-05    | 1.033511102 |
| JPH3       | 2.93E-05    | -1.01449957  | MB21D2       | 0.00038417  | 1.032100843 |
| CACNA2D3   | 2.93E-05    | -1.01449957  | KLHL6        | 9.48E-05    | 1.031395196 |
| TNFRSF25   | 2.98E-05    | -1.011587974 | CRLF1        | 4.51E-05    | 1.030689204 |
| WASF1      | 2.93E-05    | -1.011587974 | ST7-OT4      | 2.93E-05    | 1.030689204 |
| PPP1R9B    | 2.93E-05    | -1.011587974 | ARHGAP25     | 3.15E-05    | 1.029982866 |
| FGF13      | 2.99E-05    | -1.008682243 | IL18         | 9.88E-05    | 1.029276182 |
| DOCK4      | 2.93E-05    | -1.008682243 | C12orf75     | 2.93E-05    | 1.029276182 |
| NEK10      | 2.93E-05    | -1.005782353 | VSTM2A       | 0.01244972  | 1.028569152 |
| CCDC108    | 2.93E-05    | -1.005782353 | EDNRB        | 2.95E-05    | 1.028569152 |
| AC145110.1 | 0.000265126 | -1           | PLD4         | 2.94E-05    | 1.028569152 |
| HLA-DMB    | 4.31E-05    | -1           | S1PR3        | 0.00013922  | 1.027861775 |
| WDR96      | 3.98E-05    | -1           | RP11-632F7.1 | 3.01E-05    | 1.025737561 |
| NOV        | 3.84E-05    | -1           | GDPD2        | 4.31E-05    | 1.025028794 |
| ADORA2A    | 2.93E-05    | -1           | LPAR5        | 3.11E-05    | 1.025028794 |
| CES1       | 0.000957819 | 1            | AC144521.1   | 0.00079975  | 1.024319679 |
|            |             |              | SELE         | 0.000220502 | 1.024319679 |
|            |             |              | GIMAP5       | 2.94E-05    | 1.024319679 |
|            |             |              | SORCS1       | 0.002698525 | 1.022900402 |
|            |             |              | GPR137C      | 3.04E-05    | 1.022900402 |
|            |             |              | TMOD3        | 0.001046679 | 1.020768865 |
|            |             |              | ALOX5        | 0.000349687 | 1.020768865 |
|            |             |              | CHD2         | 3.46E-05    | 1.019346089 |
|            |             |              | UTS2B        | 0.00072996  | 1.018634174 |
|            |             |              | RP11-145M9.4 | 2.93E-05    | 1.018634174 |
|            |             |              | CXCL3        | 0.017538628 | 1.017921908 |
|            |             |              | CDH7         | 0.0093476   | 1.017921908 |
|            |             |              | MCL1         | 3.19E-05    | 1.017921908 |
|            |             |              | ATP13A4      | 2.95E-05    | 1.017921908 |
|            |             |              | KLF11        | 2.93E-05    | 1.017921908 |
|            |             |              | MSR1         | 0.001365182 | 1.015069322 |
|            |             |              | C1orf101     | 2.97E-05    | 1.015069322 |
|            |             |              | PCDH18       | 0.000318489 | 1.014355293 |
|            |             |              | PCSK1        | 0.000265126 | 1.014355293 |
|            |             |              | ARHGAP15     | 0.000241964 | 1.013640911 |
|            |             |              | WBP2NL       | 5.93E-05    | 1.012926174 |
|            |             |              | RARB         | 6.32E-05    | 1.012211084 |
|            |             |              | SLC16A8      | 2.93E-05    | 1.010779839 |
|            |             |              | TTN          | 3.30E-05    | 1.010063683 |
|            |             |              | KDM6A        | 2.93E-05    | 1.009347172 |
|            |             |              | CPED1        | 3.54E-05    | 1.008630305 |
|            |             |              | HSD17B6      | 2.93E-05    | 1.008630305 |
|            |             |              | FCGR1A       | 7.24E-05    | 1.007913082 |
|            |             |              | ZFP37        | 2.93E-05    | 1.007913082 |
|            |             |              | PHTF2        | 3.13E-05    | 1.006477564 |
|            |             |              | HLA-DMB      | 0.001046679 | 1.005759269 |
|            |             |              | ADAM28       | 7.24E-05    | 1.005759269 |
|            |             |              | ABI3BP       | 0.000152218 | 1.003602237 |
|            |             |              | CFD          | 2.99E-05    | 1.003602237 |
|            |             |              | GPR125       | 5.93E-05    | 1.002162421 |
|            |             |              | FMN1         | 0.003177654 | 1.001441974 |
|            |             |              | CPB2         | 9.88E-05    | 1.001441974 |
|            |             |              | KCNQ1        | 6.75E-05    | 1.001441974 |
|            |             |              | RPL23        | 2.98E-05    | 1.000721167 |

**Supplemental Table 2.** Complete list of significantly upregulated KEGG pathways in hippocampal tissue from epileptic patients compared to controls.

| KEGG Pathway                                                  | Adjusted p-value | Pathway Size | Number of Upregulated Genes in Pathway | Upregulated Genes in Pathway                                                                                                 |
|---------------------------------------------------------------|------------------|--------------|----------------------------------------|------------------------------------------------------------------------------------------------------------------------------|
| Rheumatoid arthritis                                          | 1.30E-11         | 88           | 18                                     | IL18,FOS,CD86,MMP3,HLA-DRB1,TNF,HLA-DRB5,CXCL1,IL1B,CCL2,TLR2,CXCL3,TNFRSF11A,HLA-DQA2,HLA-DMB,TLR4,HLA-DRA,CCL3             |
| Leishmaniasis                                                 | 8.05E-11         | 72           | 16                                     | C3,NFKBIA,FOS,NCF2,HLA-DRB1,TNF,HLA-DRB5,FCGR1A,IL1B,TLR2,PTGS2,CYBB,HLA-DQA2,HLA-DMB,TLR4,HLA-DRA                           |
| Staphylococcus aureus infection                               | 2.10E-06         | 87           | 13                                     | C3,CFD,C1QB,HLA-DRB1,FPR1,HLA-DRB5,FCGR1A,C1QA,FCAR,HLA-DQA2,CFB,HLA-DMB,HLA-DRA                                             |
| Phagosome                                                     | 4.98E-06         | 147          | 16                                     | C3,NCF2,THBS1,HLA-DRB1,MSR1,HLA-DRB5,FCGR1A,TLR2,OLR1,CLEC7A,FCAR,CYBB,HLA-DQA2,HLA-DMB,TLR4,HLA-DRA                         |
| Legionellosis                                                 | 1.99E-05         | 57           | 10                                     | C3,IL18,NFKBIA,CASP1,TNF,CXCL1,IL1B,TLR2,CXCL3,TLR4                                                                          |
| IL-17 signaling pathway                                       | 3.48E-05         | 92           | 12                                     | NFKBIA,FOS,IL25,MMP3,S100A9,TNF,FOSB,CXCL1,IL1B,CCL2,CXCL3,PTGS2                                                             |
| Inflammatory bowel disease                                    | 4.53E-05         | 62           | 10                                     | IL18,HLA-DRB1,TNF,HLA-DRB5,IL1B,TLR2,HLA-DQA2,HLA-DMB,TLR4,HLA-DRA                                                           |
| Cytokine-cytokine receptor interaction                        | 5.36E-05         | 292          | 21                                     | IL18,CSF1R,TNFSF18,IL25,PPBP,CSF2RA,OSM,CCL8,IL33,TNF,CX3CR1,CXCL1,IL1B,CCL2,CXCL3,TNFRSF11A,LIFR,IL6ST,IL1RN,CCL3,TNFRSF10D |
| Graft-versus-host disease                                     | 6.37E-05         | 37           | 8                                      | CD86,HLA-DRB1,TNF,HLA-DRB5,IL1B,HLA-DQA2,HLA-DMB,HLA-DRA                                                                     |
| Viral protein interaction with cytokine and cytokine receptor | 7.00E-05         | 98           | 12                                     | IL18,CSF1R,PPBP,CCL8,TNF,CX3CR1,CXCL1,CCL2,CXCL3,IL6ST,CCL3,TNFRSF10D                                                        |
| Chagas disease                                                | 9.73E-05         | 101          | 12                                     | C3,NFKBIA,FOS,C1QB,BDKRB2,TNF,IL1B,CCL2,TLR2,C1QA,TLR4,CCL3                                                                  |
| NF-kappa B signaling pathway                                  | 0.00010836       | 102          | 12                                     | NFKBIA,BCL2A1,TNF,CXCL1,IL1B,SYK,CXCL3,TNFRSF11A,GADD45B,PTGS2,TLR4,GADD45G                                                  |
| Type I diabetes mellitus                                      | 0.00012037       | 40           | 8                                      | CD86,HLA-DRB1,TNF,HLA-DRB5,IL1B,HLA-DQA2,HLA-DMB,HLA-DRA                                                                     |
| Osteoclast differentiation                                    | 0.00015921       | 125          | 13                                     | NFKBIA,FOS,CSF1R,NCF2,TREM2,SOCS3,TNF,FOSB,FCGR1A,IL1B,SYK,TNFRSF11A,IL1RB4                                                  |
| Influenza A                                                   | 0.00017496       | 168          | 15                                     | IL18,NFKBIA,CASP1,SOCS3,HLA-DRB1,IL33,TNF,HLA-DRB5,TLR7,IL1B,CCL2,HLA-DQA2,HLA-DMB,TLR4,HLA-DRA                              |
| Tuberculosis                                                  | 0.0002923        | 175          | 15                                     | C3,IL18,HLA-DRB1,TNF,HLA-DRB5,FCGR1A,IL1B,TLR2,SYK,CLEC7A,HLA-DQA2,HLA-DMB,TLR4,HLA-DRA,IRAK2                                |
| Hematopoietic cell lineage                                    | 0.00036089       | 95           | 11                                     | CSF1R,CSF2RA,HLA-DRB1,CD33,TNF,HLA-DRB5,FCGR1A,IL1B,HLA-DQA2,HLA-DMB,HLA-DRA                                                 |
| Allograft rejection                                           | 0.00046537       | 34           | 7                                      | CD86,HLA-DRB1,TNF,HLA-DRB5,HLA-DQA2,HLA-DMB,HLA-DRA                                                                          |
| Neuroactive ligand-receptor interaction                       | 0.00059061       | 339          | 21                                     | C3,RXFP1,ADORA3,ADRB2,MCHR2,HRH1,F2R,TAC3,NPY,EDNRB,BDKRB2,FPR1,DRD1,NMU,S1PR3,HTR2A,GRIK3,UTS2B,HTR1D,CHRNA3,GLP2R          |
| Malaria                                                       | 0.00060235       | 49           | 8                                      | IL18,THBS1,TNF,IL1B,CCL2,TLR2,SELE,TLR4                                                                                      |
| Asthma                                                        | 0.00143096       | 27           | 6                                      | HLA-DRB1,TNF,HLA-DRB5,HLA-DQA2,HLA-DMB,HLA-DRA                                                                               |
| TNF signaling pathway                                         | 0.00179017       | 112          | 11                                     | NFKBIA,FOS,MMP3,SOCS3,TNF,CXCL1,IL1B,CCL2,SELE,CXCL3,PTGS2                                                                   |

|                                              |                |     |    |                                                                                   |
|----------------------------------------------|----------------|-----|----|-----------------------------------------------------------------------------------|
| Pertussis                                    | 0.002356<br>32 | 76  | 9  | C3,FOS,C1QB,CASP1,TNF,IL1B,C1QA,TLR4,IRF8                                         |
| Complement and coagulation cascades          | 0.005807<br>25 | 85  | 9  | C3,CFD,C1QB,F2R,VSIG4,BDKRB2,CPB2,C1QA,CFB                                        |
| Toxoplasmosis                                | 0.007779<br>73 | 109 | 10 | ALOX5,NFKBIA,HLA-DRB1,TNF,HLA-DRB5,TLR2,HLA-DQA2,HLA-DMB,TLR4,HLA-DRA             |
| Systemic lupus erythematosus                 | 0.008262<br>35 | 132 | 11 | C3,CD86,C1QB,HLA-DRB1,TNF,HLA-DRB5,FCGR1A,C1QA,HLA-DQA2,HLA-DMB,HLA-DRA           |
| Transcriptional misregulation in cancer      | 0.015167<br>12 | 191 | 13 | CD86,CSF1R,BCL2A1,MMP3,NFKBIZ,MYC,KDM6A,NR4A3,MEF2C,SPINT1,FCGR1A,GADD45B,GADD45G |
| Pathogenic Escherichia coli infection        | 0.015979<br>83 | 192 | 13 | IL18,NFKBIA,FOS,NCKAP1L,MYO5C,SEC24D,CASP1,LPAR5,F2R,TNF,CLDN10,IL1B,TLR4         |
| Toll-like receptor signaling pathway         | 0.023923<br>81 | 102 | 9  | NFKBIA,FOS,CD86,TNF,TLR7,IL1B,TLR2,TLR4,CCL3                                      |
| Th17 cell differentiation                    | 0.027702<br>7  | 104 | 9  | NFKBIA,FOS,HLA-DRB1,HLA-DRB5,IL1B,HLA-DQA2,IL6ST,HLA-DMB,HLA-DRA                  |
| NOD-like receptor signaling pathway          | 0.028257<br>88 | 177 | 12 | IL18,NFKBIA,CASP1,TNF,GBP1,CXCL1,IL1B,CCL2,CXCL3,CYBB,TLR4,PYDC2                  |
| Intestinal immune network for IgA production | 0.028924<br>39 | 45  | 6  | CD86,HLA-DRB1,HLA-DRB5,HLA-DQA2,HLA-DMB,HLA-DRA                                   |
| Autoimmune thyroid disease                   | 0.046379<br>81 | 49  | 6  | CD86,HLA-DRB1,HLA-DRB5,HLA-DQA2,HLA-DMB,HLA-DRA                                   |

**Supplemental Table 3.** Complete list of significantly enriched GO Biological Processes in hippocampal tissue from epileptic patients compared to controls.

| Downregulated Biological Processes                            | FDR      | Upregulated Biological Process                                          | FDR      |
|---------------------------------------------------------------|----------|-------------------------------------------------------------------------|----------|
| cellular nitrogen compound biosynthetic process (GO:0044271)  | 1.65E-03 | mRNA processing (GO:0006397)                                            | 1.76E-02 |
| organonitrogen compound biosynthetic process (GO:1901566)     | 6.67E-03 | RNA splicing (GO:0008380)                                               | 4.68E-02 |
| macromolecule biosynthetic process (GO:0009059)               | 6.27E-03 | modification-dependent macromolecule catabolic process (GO:0043632)     | 4.06E-02 |
| cellular macromolecule biosynthetic process (GO:0034645)      | 1.15E-02 | RNA processing (GO:0006396)                                             | 3.04E-02 |
| catabolic process (GO:0009056)                                | 4.20E-03 | Unclassified (UNCLASSIFIED)                                             | 3.71E-04 |
| cellular catabolic process (GO:0044248)                       | 1.43E-02 | nucleic acid metabolic process (GO:0090304)                             | 1.82E-02 |
| small molecule metabolic process (GO:0044281)                 | 2.31E-02 | nucleobase-containing compound metabolic process (GO:0006139)           | 4.44E-02 |
| cellular biosynthetic process (GO:0044249)                    | 1.08E-03 | heterocycle metabolic process (GO:0046483)                              | 2.91E-02 |
| organic substance biosynthetic process (GO:1901576)           | 1.40E-03 | cellular aromatic compound metabolic process (GO:0006725)               | 3.89E-02 |
| organic substance catabolic process (GO:1901575)              | 4.69E-02 | cellular nitrogen compound metabolic process (GO:0034641)               | 4.21E-02 |
| biosynthetic process (GO:0009058)                             | 2.27E-03 | biological_process (GO:0008150)                                         | 3.69E-04 |
| cellular nitrogen compound metabolic process (GO:0034641)     | 7.96E-04 | cellular process (GO:0009987)                                           | 1.49E-05 |
| nucleobase-containing compound metabolic process (GO:0006139) | 1.17E-02 | regulation of macromolecule metabolic process (GO:0060255)              | 3.24E-02 |
| heterocycle metabolic process (GO:0046483)                    | 1.23E-02 | regulation of cellular metabolic process (GO:0031323)                   | 4.21E-02 |
| cellular aromatic compound metabolic process (GO:0006725)     | 1.38E-02 | regulation of biological process (GO:0050789)                           | 2.30E-07 |
| organic cyclic compound metabolic process (GO:1901360)        | 1.91E-02 | biological regulation (GO:0065007)                                      | 4.93E-09 |
| primary metabolic process (GO:0044238)                        | 1.29E-02 | regulation of cellular process (GO:0050794)                             | 4.01E-07 |
| cellular metabolic process (GO:0044237)                       | 1.16E-02 | regulation of metabolic process (GO:0019222)                            | 3.52E-03 |
| metabolic process (GO:0008152)                                | 1.18E-02 | localization (GO:0051179)                                               | 1.14E-02 |
| organic substance metabolic process (GO:0071704)              | 2.50E-02 | regulation of gene expression (GO:0010468)                              | 3.28E-03 |
| regulation of biological process (GO:0050789)                 | 2.49E-02 | positive regulation of nitrogen compound metabolic process (GO:0051173) | 1.76E-02 |
| regulation of cellular process (GO:0050794)                   | 2.23E-02 | multicellular organismal process (GO:0032501)                           | 1.81E-07 |
| cell communication (GO:0007154)                               | 3.80E-02 | regulation of signal transduction (GO:0009966)                          | 5.25E-03 |
| signaling (GO:0023052)                                        | 1.53E-02 | developmental process (GO:0032502)                                      | 1.01E-06 |
| cellular component organization or biogenesis (GO:0071840)    | 1.70E-03 | positive regulation of macromolecule metabolic process (GO:0010604)     | 1.20E-03 |
| cellular component organization (GO:0016043)                  | 3.58E-04 | positive regulation of cellular metabolic process (GO:0031325)          | 1.10E-03 |
| multicellular organismal process (GO:0032501)                 | 1.38E-06 | system process (GO:0003008)                                             | 3.89E-02 |
| localization (GO:0051179)                                     | 4.93E-05 | negative regulation of biological process (GO:0048519)                  | 2.77E-07 |
| cellular component biogenesis (GO:0044085)                    | 4.06E-02 | positive regulation of metabolic process (GO:0009893)                   | 1.70E-04 |
| regulation of signal transduction (GO:0009966)                | 1.61E-02 | negative regulation of gene expression (GO:0010629)                     | 3.63E-02 |
| developmental process (GO:0032502)                            | 7.14E-07 | cellular developmental process (GO:0048869)                             | 4.00E-04 |
| anatomical structure development (GO:0048856)                 | 1.28E-06 | response to stimulus (GO:0050896)                                       | 3.25E-15 |
| animal organ development (GO:0048513)                         | 2.26E-03 | anatomical structure development (GO:0048856)                           | 3.12E-07 |

|                                                                     |          |                                                                        |          |
|---------------------------------------------------------------------|----------|------------------------------------------------------------------------|----------|
| regulation of multicellular organismal process (GO:0051239)         | 8.91E-03 | regulation of cell communication (GO:0010646)                          | 3.87E-04 |
| regulation of developmental process (GO:0050793)                    | 1.61E-02 | regulation of signaling (GO:0023051)                                   | 3.18E-04 |
| regulation of molecular function (GO:0065009)                       | 2.25E-03 | positive regulation of cellular process (GO:0048522)                   | 4.14E-08 |
| cellular developmental process (GO:0048869)                         | 1.81E-04 | multicellular organism development (GO:0007275)                        | 1.35E-06 |
| cell differentiation (GO:0030154)                                   | 2.18E-04 | cell differentiation (GO:0030154)                                      | 2.10E-04 |
| multicellular organism development (GO:0007275)                     | 2.51E-07 | negative regulation of cellular process (GO:0048523)                   | 5.67E-07 |
| anatomical structure morphogenesis (GO:0009653)                     | 1.21E-02 | animal organ development (GO:0048513)                                  | 2.52E-04 |
| cellular component assembly (GO:0022607)                            | 5.54E-03 | tissue development (GO:0009888)                                        | 2.59E-02 |
| regulation of cell communication (GO:0010646)                       | 7.52E-05 | regulation of protein metabolic process (GO:0051246)                   | 9.62E-04 |
| regulation of signaling (GO:0023051)                                | 5.56E-05 | anatomical structure morphogenesis (GO:0009653)                        | 6.98E-03 |
| system development (GO:0048731)                                     | 8.41E-07 | system development (GO:0048731)                                        | 1.32E-06 |
| positive regulation of molecular function (GO:0044093)              | 1.63E-02 | positive regulation of biological process (GO:0048518)                 | 1.02E-11 |
| tissue development (GO:0009888)                                     | 1.41E-02 | cell development (GO:0048468)                                          | 2.51E-02 |
| nervous system process (GO:0050877)                                 | 3.41E-02 | cellular response to stimulus (GO:0051716)                             | 5.46E-14 |
| system process (GO:0003008)                                         | 2.04E-03 | regulation of cellular protein metabolic process (GO:0032268)          | 6.52E-04 |
| regulation of cell differentiation (GO:0045595)                     | 1.41E-02 | positive regulation of gene expression (GO:0010628)                    | 1.11E-03 |
| regulation of biological quality (GO:0065008)                       | 7.32E-09 | positive regulation of protein metabolic process (GO:0051247)          | 8.48E-03 |
| regulation of localization (GO:0032879)                             | 5.28E-07 | positive regulation of signal transduction (GO:0009967)                | 1.43E-02 |
| cell adhesion (GO:0007155)                                          | 4.87E-02 | positive regulation of signaling (GO:0023056)                          | 6.68E-03 |
| cell-cell signaling (GO:0007267)                                    | 1.52E-02 | negative regulation of signaling (GO:0023057)                          | 2.80E-02 |
| positive regulation of transport (GO:0051050)                       | 4.62E-02 | negative regulation of cell communication (GO:0010648)                 | 2.76E-02 |
| ion transport (GO:0006811)                                          | 3.54E-03 | positive regulation of cell communication (GO:0010647)                 | 6.38E-03 |
| animal organ morphogenesis (GO:0009887)                             | 1.60E-02 | regulation of molecular function (GO:0065009)                          | 1.40E-05 |
| regulation of cellular component movement (GO:0051270)              | 5.56E-03 | regulation of catalytic activity (GO:0050790)                          | 3.85E-04 |
| cytoskeleton organization (GO:0007010)                              | 1.01E-03 | regulation of biological quality (GO:0065008)                          | 5.98E-08 |
| ion transmembrane transport (GO:0034220)                            | 1.13E-02 | regulation of response to stimulus (GO:0048583)                        | 2.06E-09 |
| regulation of secretion (GO:0051046)                                | 4.05E-02 | response to chemical (GO:0042221)                                      | 5.90E-10 |
| negative regulation of cellular component organization (GO:0051129) | 2.88E-02 | regulation of hydrolase activity (GO:0051336)                          | 1.49E-02 |
| negative regulation of cell differentiation (GO:0045596)            | 4.59E-02 | positive regulation of cellular protein metabolic process (GO:0032270) | 3.12E-03 |
| cation transport (GO:0006812)                                       | 1.03E-02 | intracellular signal transduction (GO:0035556)                         | 2.66E-03 |
| regulation of transport (GO:0051049)                                | 7.92E-07 | cell communication (GO:0007154)                                        | 1.01E-14 |
| inorganic ion transmembrane transport (GO:0098660)                  | 3.22E-02 | signaling (GO:0023052)                                                 | 6.60E-15 |
| regulation of secretion by cell (GO:1903530)                        | 4.08E-02 | export from cell (GO:0140352)                                          | 3.90E-02 |
| locomotion (GO:0040011)                                             | 5.21E-05 | generation of neurons (GO:0048699)                                     | 1.30E-02 |
| cell development (GO:0048468)                                       | 2.24E-06 | regulation of protein modification process (GO:0031399)                | 4.88E-04 |
| localization of cell (GO:0051674)                                   | 3.76E-04 | response to stress (GO:0006950)                                        | 8.08E-09 |

|                                                                                 |              |                                                                  |              |
|---------------------------------------------------------------------------------|--------------|------------------------------------------------------------------|--------------|
| cell motility (GO:0048870)                                                      | 3.70E<br>-04 | neuron differentiation (GO:0030182)                              | 3.00E<br>-02 |
| central nervous system development (GO:0007417)                                 | 9.09E<br>-04 | signal transduction (GO:0007165)                                 | 2.48E<br>-14 |
| taxis (GO:0042330)                                                              | 4.10E<br>-02 | regulation of developmental process (GO:0050793)                 | 1.22E<br>-05 |
| chemotaxis (GO:0006935)                                                         | 4.04E<br>-02 | regulation of kinase activity (GO:0043549)                       | 4.94E<br>-02 |
| nervous system development (GO:0007399)                                         | 8.99E<br>-10 | secretion by cell (GO:0032940)                                   | 4.44E<br>-02 |
| organelle assembly (GO:0070925)                                                 | 3.53E<br>-03 | regulation of transferase activity (GO:0051338)                  | 2.64E<br>-02 |
| movement of cell or subcellular component (GO:0006928)                          | 1.06E<br>-07 | regulation of localization (GO:0032879)                          | 5.18E<br>-07 |
| microtubule-based process (GO:0007017)                                          | 1.40E<br>-03 | nervous system development (GO:0007399)                          | 1.20E<br>-05 |
| regulation of vesicle-mediated transport (GO:0060627)                           | 2.34E<br>-02 | secretion (GO:0046903)                                           | 1.14E<br>-02 |
| divalent inorganic cation homeostasis (GO:0072507)                              | 2.99E<br>-02 | homeostatic process (GO:0042592)                                 | 2.60E<br>-04 |
| head development (GO:0060322)                                                   | 6.35E<br>-04 | cellular response to endogenous stimulus (GO:0071495)            | 6.69E<br>-03 |
| regulation of cell projection organization (GO:0031344)                         | 4.22E<br>-03 | positive regulation of catalytic activity (GO:0043085)           | 7.12E<br>-04 |
| metal ion transport (GO:0030001)                                                | 4.14E<br>-03 | regulation of apoptotic process (GO:0042981)                     | 5.05E<br>-04 |
| calcium ion homeostasis (GO:0055074)                                            | 3.23E<br>-02 | positive regulation of protein modification process (GO:0031401) | 2.17E<br>-03 |
| brain development (GO:0007420)                                                  | 6.35E<br>-04 | positive regulation of molecular function (GO:0044093)           | 3.24E<br>-05 |
| regulation of plasma membrane bounded cell projection organization (GO:0120035) | 3.20E<br>-03 | response to endogenous stimulus (GO:0009719)                     | 7.38E<br>-04 |
| regulation of cytoskeleton organization (GO:0051493)                            | 6.47E<br>-03 | negative regulation of response to stimulus (GO:0048585)         | 2.89E<br>-05 |
| neurogenesis (GO:0022008)                                                       | 1.42E<br>-08 | regulation of programmed cell death (GO:0043067)                 | 2.55E<br>-04 |
| regulation of nervous system development (GO:0051960)                           | 1.41E<br>-02 | neuron development (GO:0048666)                                  | 2.20E<br>-02 |
| cell morphogenesis (GO:0000902)                                                 | 2.15E<br>-04 | regulation of intracellular signal transduction (GO:1902531)     | 3.44E<br>-05 |
| regulation of neurogenesis (GO:0050767)                                         | 3.64E<br>-02 | regulation of cell death (GO:0010941)                            | 6.79E<br>-05 |
| regulation of anatomical structure size (GO:0090066)                            | 2.54E<br>-03 | movement of cell or subcellular component (GO:0006928)           | 1.01E<br>-04 |
| synaptic signaling (GO:0099536)                                                 | 7.06E<br>-03 | regulated exocytosis (GO:0045055)                                | 4.59E<br>-02 |
| regulation of cellular component size (GO:0032535)                              | 1.25E<br>-02 | positive regulation of response to stimulus (GO:0048584)         | 2.14E<br>-07 |
| generation of neurons (GO:0048699)                                              | 8.83E<br>-10 | regulation of phosphorus metabolic process (GO:0051174)          | 8.42E<br>-06 |
| regulation of supramolecular fiber organization (GO:1902903)                    | 9.23E<br>-03 | regulation of phosphate metabolic process (GO:0019220)           | 8.38E<br>-06 |
| cell morphogenesis involved in differentiation (GO:0000904)                     | 3.29E<br>-04 | regulation of transport (GO:0051049)                             | 1.01E<br>-05 |
| trans-synaptic signaling (GO:0099537)                                           | 4.06E<br>-03 | response to nitrogen compound (GO:1901698)                       | 2.06E<br>-03 |
| cell junction assembly (GO:0034329)                                             | 3.81E<br>-02 | neurogenesis (GO:0022008)                                        | 2.74E<br>-04 |
| axonogenesis (GO:0007409)                                                       | 4.29E<br>-03 | response to abiotic stimulus (GO:0009628)                        | 1.31E<br>-03 |
| cellular component morphogenesis (GO:0032989)                                   | 4.70E<br>-05 | regulation of protein transport (GO:0051223)                     | 4.80E<br>-02 |
| neuron differentiation (GO:0030182)                                             | 5.26E<br>-09 | head development (GO:0060322)                                    | 1.16E<br>-02 |
| chemical synaptic transmission (GO:0007268)                                     | 2.67E<br>-03 | G protein-coupled receptor signaling pathway (GO:0007186)        | 2.55E<br>-04 |
| anterograde trans-synaptic signaling (GO:0098916)                               | 2.64E<br>-03 | regulation of multicellular organismal process (GO:0051239)      | 8.82E<br>-10 |
| plasma membrane bounded cell projection assembly (GO:0120031)                   | 1.07E<br>-03 | immune effector process (GO:0002252)                             | 1.29E<br>-03 |
| regulation of blood circulation (GO:1903522)                                    | 1.99E<br>-02 | regulation of phosphorylation (GO:0042325)                       | 1.21E<br>-05 |

|                                                                    |          |                                                                                 |          |
|--------------------------------------------------------------------|----------|---------------------------------------------------------------------------------|----------|
| cilium organization (GO:0044782)                                   | 3.74E-03 | regulation of ion transport (GO:0043269)                                        | 1.59E-02 |
| cell projection assembly (GO:0030031)                              | 5.98E-04 | negative regulation of cell death (GO:0060548)                                  | 1.94E-03 |
| neuron development (GO:0048666)                                    | 1.16E-07 | negative regulation of apoptotic process (GO:0043066)                           | 3.51E-03 |
| regulation of heart contraction (GO:0008016)                       | 4.30E-02 | hematopoietic or lymphoid organ development (GO:0048534)                        | 3.06E-02 |
| axon development (GO:0061564)                                      | 1.39E-03 | cell-cell signaling (GO:0007267)                                                | 6.08E-04 |
| regulation of neuron projection development (GO:0010975)           | 8.54E-04 | biological adhesion (GO:0022610)                                                | 1.81E-03 |
| plasma membrane bounded cell projection organization (GO:0120036)  | 9.61E-11 | regulation of multicellular organismal development (GO:2000026)                 | 6.53E-05 |
| heart morphogenesis (GO:0003007)                                   | 4.20E-02 | localization of cell (GO:0051674)                                               | 3.88E-04 |
| regulation of metal ion transport (GO:0010959)                     | 2.04E-03 | cell motility (GO:0048870)                                                      | 3.86E-04 |
| regulation of membrane potential (GO:0042391)                      | 7.96E-04 | cell surface receptor signaling pathway (GO:0007166)                            | 3.57E-10 |
| regulation of actin filament organization (GO:0110053)             | 1.59E-02 | cell adhesion (GO:0007155)                                                      | 1.69E-03 |
| cell morphogenesis involved in neuron differentiation (GO:0048667) | 4.03E-04 | response to organonitrogen compound (GO:0010243)                                | 1.03E-03 |
| regulation of actin cytoskeleton organization (GO:0032956)         | 2.57E-03 | positive regulation of hydrolase activity (GO:0051345)                          | 5.53E-03 |
| developmental maturation (GO:0021700)                              | 3.75E-02 | locomotion (GO:0040011)                                                         | 4.12E-05 |
| neuron projection guidance (GO:0097485)                            | 1.41E-02 | response to organic substance (GO:0010033)                                      | 5.99E-13 |
| axon guidance (GO:0007411)                                         | 1.38E-02 | cellular response to chemical stimulus (GO:0070887)                             | 1.42E-12 |
| cell part morphogenesis (GO:0032990)                               | 3.99E-05 | immune system development (GO:0002520)                                          | 1.53E-02 |
| cilium assembly (GO:0060271)                                       | 2.06E-03 | regulation of protein phosphorylation (GO:0001932)                              | 8.77E-06 |
| plasma membrane bounded cell projection morphogenesis (GO:0120039) | 5.54E-05 | positive regulation of transferase activity (GO:0051347)                        | 1.12E-02 |
| cell projection organization (GO:0030030)                          | 7.77E-13 | negative regulation of programmed cell death (GO:0043069)                       | 1.49E-03 |
| neuron projection morphogenesis (GO:0048812)                       | 5.02E-05 | brain development (GO:0007420)                                                  | 4.84E-03 |
| divalent inorganic cation transport (GO:0072511)                   | 7.34E-03 | blood vessel development (GO:0001568)                                           | 4.58E-02 |
| regulation of ion transport (GO:0043269)                           | 8.86E-08 | adaptive immune response (GO:0002250)                                           | 1.72E-02 |
| cell junction organization (GO:0034330)                            | 3.71E-05 | cellular response to organonitrogen compound (GO:0071417)                       | 1.54E-02 |
| regulation of actin filament-based process (GO:0032970)            | 3.25E-04 | positive regulation of intracellular signal transduction (GO:1902533)           | 2.83E-04 |
| neuron projection development (GO:0031175)                         | 1.21E-07 | immune system process (GO:0002376)                                              | 1.42E-13 |
| cell projection morphogenesis (GO:0048858)                         | 2.02E-05 | cell population proliferation (GO:0008283)                                      | 3.84E-02 |
| divalent metal ion transport (GO:0070838)                          | 6.09E-03 | immune response-regulating cell surface receptor signaling pathway (GO:0002768) | 3.79E-02 |
| regulation of exocytosis (GO:0017157)                              | 4.02E-02 | hemopoiesis (GO:0030097)                                                        | 1.22E-02 |
| regulation of transmembrane transport (GO:0034762)                 | 4.14E-07 | positive regulation of apoptotic process (GO:0043065)                           | 1.58E-02 |
| regulation of system process (GO:0044057)                          | 1.29E-07 | regulation of system process (GO:0044057)                                       | 1.20E-02 |
| calcium ion transmembrane transport (GO:0070588)                   | 2.46E-02 | positive regulation of transport (GO:0051050)                                   | 3.27E-04 |
| behavior (GO:0007610)                                              | 3.19E-08 | cellular response to nitrogen compound (GO:1901699)                             | 4.95E-03 |
| negative regulation of cell projection organization (GO:0031345)   | 1.67E-02 | tube development (GO:0035295)                                                   | 7.54E-04 |
| calcium ion transport (GO:0006816)                                 | 1.48E-03 | regulation of cellular component movement (GO:0051270)                          | 9.89E-05 |
| regulation of synapse organization (GO:0050807)                    | 4.36E-03 | muscle structure development (GO:0061061)                                       | 3.22E-02 |



|                                                                   |          |                                                                              |          |
|-------------------------------------------------------------------|----------|------------------------------------------------------------------------------|----------|
| negative regulation of neuron projection development (GO:0010977) | 4.09E-02 | synaptic signaling (GO:0099536)                                              | 4.28E-02 |
| microtubule-based movement (GO:0007018)                           | 9.59E-06 | cell migration (GO:0016477)                                                  | 1.61E-04 |
| regulation of ion transmembrane transport (GO:0034765)            | 2.08E-08 | regulation of cell differentiation (GO:0045595)                              | 1.41E-07 |
| regulation of axonogenesis (GO:0050770)                           | 1.21E-02 | granulocyte activation (GO:0036230)                                          | 2.25E-02 |
| neuron migration (GO:0001764)                                     | 3.24E-02 | positive regulation of protein phosphorylation (GO:0001934)                  | 7.63E-05 |
| adult behavior (GO:0030534)                                       | 1.50E-02 | interspecies interaction between organisms (GO:0044419)                      | 3.22E-11 |
| regulation of synapse structure or activity (GO:0050803)          | 5.56E-04 | positive regulation of programmed cell death (GO:0043068)                    | 9.08E-03 |
| multicellular organismal signaling (GO:0035637)                   | 1.42E-02 | immune response-regulating signaling pathway (GO:0002764)                    | 2.10E-02 |
| synapse organization (GO:0050808)                                 | 2.58E-05 | positive regulation of kinase activity (GO:0033674)                          | 4.66E-03 |
| regulation of cation transmembrane transport (GO:1904062)         | 1.71E-07 | positive regulation of protein kinase activity (GO:0045860)                  | 1.12E-02 |
| synapse assembly (GO:0007416)                                     | 3.98E-02 | cellular response to organic substance (GO:0071310)                          | 3.08E-13 |
| regulation of neurotransmitter transport (GO:0051588)             | 3.83E-02 | central nervous system development (GO:0007417)                              | 2.72E-05 |
| regulation of potassium ion transport (GO:0043266)                | 3.82E-02 | negative regulation of intracellular signal transduction (GO:1902532)        | 1.46E-02 |
| cognition (GO:0050890)                                            | 3.30E-07 | response to oxygen-containing compound (GO:1901700)                          | 1.40E-08 |
| regulation of nervous system process (GO:0031644)                 | 1.47E-03 | response to organic cyclic compound (GO:0014070)                             | 1.03E-04 |
| cytosolic calcium ion transport (GO:0060401)                      | 2.35E-02 | negative regulation of developmental process (GO:0051093)                    | 9.97E-05 |
| neuromuscular process (GO:0050905)                                | 4.48E-03 | regulation of cell motility (GO:2000145)                                     | 3.72E-05 |
| limbic system development (GO:0021761)                            | 4.27E-03 | positive regulation of protein transport (GO:0051222)                        | 4.94E-02 |
| regulation of neurotransmitter secretion (GO:0046928)             | 2.00E-02 | regulation of cell population proliferation (GO:0042127)                     | 2.04E-09 |
| regulation of transmembrane transporter activity (GO:0022898)     | 2.10E-08 | positive regulation of phosphorylation (GO:0042327)                          | 5.18E-06 |
| action potential (GO:0001508)                                     | 9.13E-03 | positive regulation of phosphorus metabolic process (GO:0010562)             | 1.86E-06 |
| learning or memory (GO:0007611)                                   | 3.74E-08 | positive regulation of phosphate metabolic process (GO:0045937)              | 1.84E-06 |
| regulation of synaptic transmission, glutamatergic (GO:0051966)   | 4.10E-02 | positive regulation of developmental process (GO:0051094)                    | 3.33E-07 |
| hippocampus development (GO:0021766)                              | 1.68E-02 | response to external stimulus (GO:0009605)                                   | 1.46E-15 |
| regulation of ion transmembrane transporter activity (GO:0032412) | 1.16E-08 | regulation of metal ion transport (GO:0010959)                               | 2.37E-02 |
| regulation of transporter activity (GO:0032409)                   | 2.01E-09 | regulation of locomotion (GO:0040012)                                        | 8.88E-06 |
| negative regulation of axonogenesis (GO:0050771)                  | 3.38E-02 | cell activation involved in immune response (GO:0002263)                     | 1.05E-03 |
| sperm motility (GO:0097722)                                       | 6.13E-03 | cell-cell adhesion (GO:0098609)                                              | 4.75E-03 |
| flagellated sperm motility (GO:0030317)                           | 6.08E-03 | response to drug (GO:0042493)                                                | 2.11E-02 |
| positive regulation of synaptic transmission (GO:0050806)         | 1.67E-04 | regulation of anatomical structure size (GO:0090066)                         | 3.30E-03 |
| dendrite development (GO:0016358)                                 | 9.73E-04 | leukocyte activation involved in immune response (GO:0002366)                | 9.61E-04 |
| regulation of signaling receptor activity (GO:0010469)            | 2.68E-06 | immune response (GO:0006955)                                                 | 1.14E-12 |
| learning (GO:0007612)                                             | 1.84E-05 | positive regulation of cell population proliferation (GO:0008284)            | 1.46E-05 |
| regulation of trans-synaptic signaling (GO:0099177)               | 1.01E-16 | positive regulation of protein serine/threonine kinase activity (GO:0071902) | 4.90E-02 |
| modulation of chemical synaptic transmission (GO:0050804)         | 1.87E-16 | regulation of cell migration (GO:0030334)                                    | 1.89E-05 |
| postsynapse organization (GO:0099173)                             | 4.22E-03 | activation of immune response (GO:0002253)                                   | 2.95E-03 |

|                                                                                  |              |                                                                      |              |
|----------------------------------------------------------------------------------|--------------|----------------------------------------------------------------------|--------------|
| memory (GO:0007613)                                                              | 9.23E<br>-05 | regulation of immune response (GO:0050776)                           | 5.73E<br>-07 |
| associative learning (GO:0008306)                                                | 3.77E<br>-03 | negative regulation of multicellular organismal process (GO:0051241) | 2.00E<br>-06 |
| protein localization to synapse (GO:0035418)                                     | 2.00E<br>-02 | multicellular organismal homeostasis (GO:0048871)                    | 2.45E<br>-02 |
| cilium-dependent cell motility (GO:0060285)                                      | 1.78E<br>-04 | circulatory system process (GO:0003013)                              | 3.55E<br>-03 |
| cilium or flagellum-dependent cell motility (GO:0001539)                         | 1.75E<br>-04 | myeloid cell activation involved in immune response (GO:0002275)     | 2.50E<br>-03 |
| nerve development (GO:0021675)                                                   | 3.11E<br>-03 | positive regulation of cell death (GO:0010942)                       | 4.95E<br>-04 |
| cilium movement involved in cell motility (GO:0060294)                           | 4.09E<br>-04 | regulation of secretion by cell (GO:1903530)                         | 4.93E<br>-04 |
| long-term synaptic potentiation (GO:0060291)                                     | 4.49E<br>-02 | regulation of response to stress (GO:0080134)                        | 1.27E<br>-10 |
| visual learning (GO:0008542)                                                     | 4.18E<br>-02 | forebrain development (GO:0030900)                                   | 1.14E<br>-02 |
| regulation of cation channel activity (GO:2001257)                               | 7.60E<br>-09 | positive regulation of immune response (GO:0050778)                  | 8.03E<br>-05 |
| regulation of neuron migration (GO:2001222)                                      | 3.99E<br>-02 | regulation of immune system process (GO:0002682)                     | 4.48E<br>-12 |
| cellular response to vascular endothelial growth factor stimulus (GO:0035924)    | 3.76E<br>-02 | negative regulation of cell differentiation (GO:0045596)             | 2.83E<br>-04 |
| microtubule bundle formation (GO:0001578)                                        | 2.27E<br>-05 | regulation of MAPK cascade (GO:0043408)                              | 9.32E<br>-05 |
| intraspecies interaction between organisms (GO:0051703)                          | 1.24E<br>-02 | positive regulation of multicellular organismal process (GO:0051240) | 4.59E<br>-10 |
| social behavior (GO:0035176)                                                     | 1.23E<br>-02 | muscle organ development (GO:0007517)                                | 4.99E<br>-02 |
| neuromuscular junction development (GO:0007528)                                  | 3.24E<br>-02 | positive regulation of MAPK cascade (GO:0043410)                     | 1.26E<br>-03 |
| dendrite morphogenesis (GO:0048813)                                              | 4.14E<br>-03 | regulation of epithelial cell proliferation (GO:0050678)             | 1.75E<br>-02 |
| cilium movement (GO:0003341)                                                     | 4.05E<br>-08 | lymphocyte activation (GO:0046649)                                   | 8.36E<br>-03 |
| regulation of synaptic plasticity (GO:0048167)                                   | 5.03E<br>-11 | negative regulation of inflammatory response (GO:0050728)            | 2.24E<br>-02 |
| modulation of excitatory postsynaptic potential (GO:0098815)                     | 6.76E<br>-03 | cell activation (GO:0001775)                                         | 7.84E<br>-08 |
| extracellular transport (GO:0006858)                                             | 1.71E<br>-02 | striated muscle tissue development (GO:0014706)                      | 4.07E<br>-02 |
| epithelial cilium movement involved in extracellular fluid movement (GO:0003351) | 1.38E<br>-02 | positive regulation of secretion by cell (GO:1903532)                | 1.82E<br>-02 |
| semaphorin-plexin signaling pathway (GO:0071526)                                 | 3.90E<br>-03 | cellular response to organic cyclic compound (GO:0071407)            | 6.85E<br>-04 |
| ionotropic glutamate receptor signaling pathway (GO:0035235)                     | 4.25E<br>-02 | regulation of trans-synaptic signaling (GO:0099177)                  | 2.65E<br>-03 |
| positive regulation of synaptic transmission, glutamatergic (GO:0051968)         | 1.26E<br>-02 | modulation of chemical synaptic transmission (GO:0050804)            | 2.59E<br>-03 |
| axoneme assembly (GO:0035082)                                                    | 8.71E<br>-07 | leukocyte activation (GO:0045321)                                    | 1.96E<br>-07 |
| bone resorption (GO:0045453)                                                     | 3.96E<br>-02 | regulation of peptide secretion (GO:0002791)                         | 5.22E<br>-03 |
| axonemal dynein complex assembly (GO:0070286)                                    | 3.16E<br>-03 | negative regulation of immune response (GO:0050777)                  | 6.98E<br>-03 |
| regulation of neurotransmitter receptor activity (GO:0099601)                    | 3.77E<br>-08 | vascular process in circulatory system (GO:0003018)                  | 3.00E<br>-02 |
| neuron cellular homeostasis (GO:0070050)                                         | 1.04E<br>-02 | positive regulation of cell differentiation (GO:0045597)             | 6.51E<br>-07 |
| dendritic spine development (GO:0060996)                                         | 9.19E<br>-03 | negative regulation of transport (GO:0051051)                        | 1.05E<br>-03 |
| regulation of NMDA receptor activity (GO:2000310)                                | 6.06E<br>-04 | defense response to other organism (GO:0098542)                      | 1.01E<br>-08 |
| exploration behavior (GO:0035640)                                                | 7.11E<br>-03 | telencephalon development (GO:0021537)                               | 2.76E<br>-02 |
| regulation of Arp2/3 complex-mediated actin nucleation (GO:0034315)              | 2.47E<br>-02 | regulation of secretion (GO:0051046)                                 | 8.87E<br>-06 |
| innervation (GO:0060384)                                                         | 6.30E<br>-03 | positive regulation of MAP kinase activity (GO:0043406)              | 3.68E<br>-02 |
| vocalization behavior (GO:0071625)                                               | 2.15E<br>-02 | negative regulation of defense response (GO:0031348)                 | 1.61E<br>-03 |

|                                                                       |          |                                                                                               |          |
|-----------------------------------------------------------------------|----------|-----------------------------------------------------------------------------------------------|----------|
| positive regulation of excitatory postsynaptic potential (GO:2000463) | 1.14E-03 | negative regulation of response to external stimulus (GO:0032102)                             | 7.29E-05 |
| vascular endothelial growth factor signaling pathway (GO:0038084)     | 4.73E-03 | regulation of cysteine-type endopeptidase activity involved in apoptotic process (GO:0043281) | 4.97E-02 |
| regulation of AMPA receptor activity (GO:2000311)                     | 8.60E-04 | positive regulation of immune system process (GO:0002684)                                     | 6.14E-10 |
| regulation of neuronal synaptic plasticity (GO:0048168)               | 4.59E-08 | cellular response to oxygen-containing compound (GO:1901701)                                  | 3.92E-10 |
| long-term synaptic depression (GO:0060292)                            | 1.61E-02 | myeloid leukocyte activation (GO:0002274)                                                     | 2.20E-05 |
| postsynapse assembly (GO:0099068)                                     | 1.60E-02 | leukocyte differentiation (GO:0002521)                                                        | 2.76E-03 |
| regulation of long-term neuronal synaptic plasticity (GO:0048169)     | 7.51E-04 | negative regulation of cell population proliferation (GO:0008285)                             | 1.66E-06 |
| dentate gyrus development (GO:0021542)                                | 1.45E-02 | blood circulation (GO:0008015)                                                                | 7.94E-04 |
| postsynaptic specialization organization (GO:0099084)                 | 1.44E-02 | humoral immune response (GO:0006959)                                                          | 1.16E-03 |
| dendritic spine morphogenesis (GO:0060997)                            | 1.43E-02 | activation of protein kinase activity (GO:0032147)                                            | 3.67E-03 |
| postsynaptic density organization (GO:0097106)                        | 1.43E-02 | response to external biotic stimulus (GO:0043207)                                             | 1.23E-14 |
| calcium ion-regulated exocytosis of neurotransmitter (GO:0048791)     | 1.26E-02 | response to other organism (GO:0051707)                                                       | 1.27E-14 |
| outer dynein arm assembly (GO:0036158)                                | 2.24E-03 | cellular response to tumor necrosis factor (GO:0071356)                                       | 1.79E-02 |
| facial nerve morphogenesis (GO:0021610)                               | 4.94E-02 | response to biotic stimulus (GO:0009607)                                                      | 5.53E-15 |
| cranial nerve structural organization (GO:0021604)                    | 4.92E-02 | regulation of protein secretion (GO:0050708)                                                  | 2.17E-03 |
| facial nerve development (GO:0021561)                                 | 4.90E-02 | positive regulation of lymphocyte activation (GO:0051251)                                     | 9.73E-04 |
| positive regulation of synaptic plasticity (GO:0031915)               | 4.88E-02 | negative regulation of immune system process (GO:0002683)                                     | 8.84E-06 |
| endothelial cell chemotaxis (GO:0035767)                              | 4.86E-02 | learning or memory (GO:0007611)                                                               | 1.14E-02 |
| negative regulation of collateral sprouting (GO:0048671)              | 4.09E-02 | regulation of neuron death (GO:1901214)                                                       | 3.11E-03 |
| facial nerve structural organization (GO:0021612)                     | 3.50E-02 | response to cytokine (GO:0034097)                                                             | 8.13E-12 |
| regulation of synapse structural plasticity (GO:0051823)              | 3.48E-02 | response to lipid (GO:0033993)                                                                | 1.25E-08 |
| modification of synaptic structure (GO:0099563)                       | 3.47E-02 | behavior (GO:0007610)                                                                         | 6.66E-06 |
| postsynaptic specialization assembly (GO:0098698)                     | 2.78E-02 | regulation of lymphocyte activation (GO:0051249)                                              | 1.35E-05 |
| postsynaptic density assembly (GO:0097107)                            | 2.77E-02 | taxis (GO:0042330)                                                                            | 7.81E-06 |
| maintenance of postsynaptic density structure (GO:0099562)            | 2.16E-02 | response to tumor necrosis factor (GO:0034612)                                                | 5.52E-03 |
| maintenance of postsynaptic specialization structure (GO:0098880)     | 2.15E-02 | chemotaxis (GO:0006935)                                                                       | 7.38E-06 |
| axonogenesis involved in innervation (GO:0060385)                     | 1.63E-02 | regulation of immune effector process (GO:0002697)                                            | 4.16E-05 |
| modification of postsynaptic structure (GO:0099010)                   | 1.62E-02 | defense response (GO:0006952)                                                                 | 6.94E-16 |
| synaptic growth at neuromuscular junction (GO:0051124)                | 1.28E-02 | cognition (GO:0050890)                                                                        | 2.06E-03 |
| axonemal central apparatus assembly (GO:1904158)                      | 1.27E-02 | positive regulation of secretion (GO:0051047)                                                 | 8.57E-04 |
|                                                                       |          | regulation of cell junction assembly (GO:1901888)                                             | 2.89E-02 |
|                                                                       |          | regulation of cell activation (GO:0050865)                                                    | 2.14E-07 |
|                                                                       |          | innate immune response (GO:0045087)                                                           | 1.38E-09 |
|                                                                       |          | regulation of response to external stimulus (GO:0032101)                                      | 4.54E-14 |
|                                                                       |          | regulation of neuron apoptotic process (GO:0043523)                                           | 1.75E-02 |
|                                                                       |          | response to mechanical stimulus (GO:0009612)                                                  | 1.75E-02 |

|  |                                                                                                          |          |
|--|----------------------------------------------------------------------------------------------------------|----------|
|  | antigen processing and presentation of exogenous peptide antigen (GO:0002478)                            | 4.13E-02 |
|  | negative regulation of cell adhesion (GO:0007162)                                                        | 2.61E-03 |
|  | regulation of I-kappaB kinase/NF-kappaB signaling (GO:0043122)                                           | 6.41E-03 |
|  | regulation of DNA-binding transcription factor activity (GO:0051090)                                     | 3.99E-05 |
|  | positive regulation of cell motility (GO:2000147)                                                        | 2.19E-06 |
|  | cellular response to cytokine stimulus (GO:0071345)                                                      | 1.12E-12 |
|  | regulation of cell adhesion (GO:0030155)                                                                 | 1.52E-08 |
|  | positive regulation of cellular component movement (GO:0051272)                                          | 1.18E-06 |
|  | response to bacterium (GO:0009617)                                                                       | 7.63E-09 |
|  | positive regulation of cell migration (GO:0030335)                                                       | 2.96E-06 |
|  | negative regulation of cell activation (GO:0050866)                                                      | 1.43E-02 |
|  | negative regulation of cell-cell adhesion (GO:0022408)                                                   | 1.98E-02 |
|  | positive regulation of locomotion (GO:0040017)                                                           | 4.12E-07 |
|  | regulation of leukocyte activation (GO:0002694)                                                          | 4.60E-08 |
|  | negative regulation of neuron apoptotic process (GO:0043524)                                             | 4.92E-02 |
|  | positive regulation of cell activation (GO:0050867)                                                      | 1.12E-05 |
|  | G protein-coupled receptor signaling pathway, coupled to cyclic nucleotide second messenger (GO:0007187) | 2.32E-03 |
|  | cellular response to lipid (GO:0071396)                                                                  | 1.29E-06 |
|  | regulation of hemopoiesis (GO:1903706)                                                                   | 2.12E-05 |
|  | positive regulation of leukocyte activation (GO:0002696)                                                 | 7.62E-06 |
|  | regulation of lymphocyte differentiation (GO:0045619)                                                    | 1.43E-02 |
|  | regulation of defense response (GO:0031347)                                                              | 1.42E-12 |
|  | regulation of peptidyl-tyrosine phosphorylation (GO:0050730)                                             | 1.06E-03 |
|  | positive regulation of DNA-binding transcription factor activity (GO:0051091)                            | 6.32E-04 |
|  | regulation of response to wounding (GO:1903034)                                                          | 2.23E-02 |
|  | positive regulation of peptide secretion (GO:0002793)                                                    | 7.94E-03 |
|  | positive regulation of ERK1 and ERK2 cascade (GO:0070374)                                                | 4.56E-03 |
|  | regulation of blood pressure (GO:0008217)                                                                | 7.65E-03 |
|  | regulation of leukocyte differentiation (GO:1902105)                                                     | 3.15E-04 |
|  | positive regulation of cytokine production (GO:0001819)                                                  | 6.70E-07 |
|  | regulation of myeloid cell differentiation (GO:0045637)                                                  | 1.29E-03 |
|  | negative regulation of leukocyte activation (GO:0002695)                                                 | 6.29E-03 |
|  | myeloid cell differentiation (GO:0030099)                                                                | 1.24E-03 |
|  | regulation of production of molecular mediator of immune response (GO:0002700)                           | 1.77E-02 |
|  | positive regulation of cell adhesion (GO:0045785)                                                        | 8.82E-07 |
|  | response to temperature stimulus (GO:0009266)                                                            | 9.42E-03 |

|  |                                                                       |          |
|--|-----------------------------------------------------------------------|----------|
|  | regulation of osteoblast differentiation (GO:0045667)                 | 4.85E-02 |
|  | regulation of myeloid leukocyte differentiation (GO:0002761)          | 4.84E-02 |
|  | regulation of cytokine-mediated signaling pathway (GO:0001959)        | 8.63E-03 |
|  | skeletal muscle organ development (GO:0060538)                        | 2.52E-02 |
|  | regulation of cytokine production (GO:0001817)                        | 5.04E-13 |
|  | regulation of ERK1 and ERK2 cascade (GO:0070372)                      | 4.42E-05 |
|  | renal system process (GO:0003014)                                     | 4.08E-02 |
|  | cellular response to interleukin-1 (GO:0071347)                       | 3.92E-03 |
|  | leukocyte migration (GO:0050900)                                      | 1.19E-06 |
|  | cytokine-mediated signaling pathway (GO:0019221)                      | 1.20E-12 |
|  | positive regulation of immune effector process (GO:0002699)           | 6.99E-04 |
|  | regulation of wound healing (GO:0061041)                              | 2.12E-02 |
|  | cytokine production (GO:0001816)                                      | 6.38E-03 |
|  | regulation of cell-cell adhesion (GO:0022407)                         | 7.94E-08 |
|  | glial cell development (GO:0021782)                                   | 3.60E-02 |
|  | response to interleukin-1 (GO:0070555)                                | 1.07E-03 |
|  | negative regulation of lymphocyte activation (GO:0051250)             | 5.83E-03 |
|  | icosanoid metabolic process (GO:0006690)                              | 3.42E-02 |
|  | positive regulation of protein secretion (GO:0050714)                 | 3.05E-03 |
|  | positive regulation of response to external stimulus (GO:0032103)     | 8.79E-10 |
|  | regulation of chemotaxis (GO:0050920)                                 | 2.52E-04 |
|  | positive regulation of peptidyl-tyrosine phosphorylation (GO:0050731) | 7.82E-04 |
|  | glial cell differentiation (GO:0010001)                               | 1.39E-03 |
|  | skeletal muscle tissue development (GO:0007519)                       | 1.58E-02 |
|  | regulation of leukocyte chemotaxis (GO:0002688)                       | 1.58E-02 |
|  | regulation of response to cytokine stimulus (GO:0060759)              | 1.23E-03 |
|  | regulation of gliogenesis (GO:0014013)                                | 4.91E-02 |
|  | negative regulation of transmembrane transport (GO:0034763)           | 1.45E-02 |
|  | regulation of T cell differentiation (GO:0045580)                     | 3.59E-03 |
|  | regulation of mononuclear cell proliferation (GO:0032944)             | 8.38E-05 |
|  | regulation of T cell activation (GO:0050863)                          | 4.46E-07 |
|  | regulation of lymphocyte proliferation (GO:0050670)                   | 7.62E-05 |
|  | negative regulation of leukocyte cell-cell adhesion (GO:1903038)      | 6.37E-03 |
|  | regulation of tube size (GO:0035150)                                  | 3.31E-03 |
|  | regulation of blood vessel diameter (GO:0097746)                      | 3.15E-03 |
|  | regulation of tube diameter (GO:0035296)                              | 3.14E-03 |

|  |                                                                                                                                                      |          |
|--|------------------------------------------------------------------------------------------------------------------------------------------------------|----------|
|  | negative regulation of cytokine production (GO:0001818)                                                                                              | 2.28E-06 |
|  | positive regulation of leukocyte differentiation (GO:1902107)                                                                                        | 1.57E-03 |
|  | positive regulation of hemopoiesis (GO:1903708)                                                                                                      | 1.57E-03 |
|  | gliogenesis (GO:0042063)                                                                                                                             | 3.10E-05 |
|  | regulation of adaptive immune response based on somatic recombination of immune receptors built from immunoglobulin superfamily domains (GO:0002822) | 1.42E-03 |
|  | negative regulation of immune effector process (GO:0002698)                                                                                          | 5.22E-03 |
|  | positive regulation of defense response (GO:0031349)                                                                                                 | 2.60E-08 |
|  | regulation of reactive oxygen species metabolic process (GO:2000377)                                                                                 | 1.94E-04 |
|  | positive regulation of cell-cell adhesion (GO:0022409)                                                                                               | 1.64E-06 |
|  | positive regulation of T cell activation (GO:0050870)                                                                                                | 4.78E-05 |
|  | positive regulation of adaptive immune response (GO:0002821)                                                                                         | 1.82E-02 |
|  | phospholipase C-activating G protein-coupled receptor signaling pathway (GO:0007200)                                                                 | 1.68E-02 |
|  | toll-like receptor signaling pathway (GO:0002224)                                                                                                    | 1.68E-02 |
|  | regulation of smooth muscle cell proliferation (GO:0048660)                                                                                          | 1.98E-03 |
|  | regulation of leukocyte proliferation (GO:0070663)                                                                                                   | 3.62E-06 |
|  | regulation of fat cell differentiation (GO:0045598)                                                                                                  | 1.89E-03 |
|  | cell chemotaxis (GO:0060326)                                                                                                                         | 2.86E-05 |
|  | myeloid leukocyte differentiation (GO:0002573)                                                                                                       | 3.56E-03 |
|  | negative regulation of T cell activation (GO:0050868)                                                                                                | 3.55E-03 |
|  | regulation of adaptive immune response (GO:0002819)                                                                                                  | 2.28E-04 |
|  | regulation of inflammatory response (GO:0050727)                                                                                                     | 1.11E-14 |
|  | regulation of leukocyte cell-cell adhesion (GO:1903037)                                                                                              | 1.54E-08 |
|  | regulation of leukocyte migration (GO:0002685)                                                                                                       | 1.17E-05 |
|  | regulation of lipid localization (GO:1905952)                                                                                                        | 3.99E-04 |
|  | positive regulation of chemotaxis (GO:0050921)                                                                                                       | 8.09E-04 |
|  | positive regulation of NF-kappaB transcription factor activity (GO:0051092)                                                                          | 1.84E-04 |
|  | positive regulation of mononuclear cell proliferation (GO:0032946)                                                                                   | 6.45E-04 |
|  | positive regulation of leukocyte proliferation (GO:0070665)                                                                                          | 3.06E-04 |
|  | negative regulation of leukocyte proliferation (GO:0070664)                                                                                          | 1.14E-02 |
|  | positive regulation of fat cell differentiation (GO:0045600)                                                                                         | 4.92E-02 |
|  | positive regulation of lymphocyte proliferation (GO:0050671)                                                                                         | 6.13E-04 |
|  | negative regulation of T cell proliferation (GO:0042130)                                                                                             | 4.91E-02 |
|  | regulation of T cell proliferation (GO:0042129)                                                                                                      | 6.77E-05 |
|  | positive regulation of lymphocyte differentiation (GO:0045621)                                                                                       | 5.22E-03 |
|  | positive regulation of response to wounding (GO:1903036)                                                                                             | 4.64E-02 |

|  |                                                                                     |          |
|--|-------------------------------------------------------------------------------------|----------|
|  | chemokine-mediated signaling pathway (GO:0070098)                                   | 2.12E-02 |
|  | positive regulation of leukocyte cell-cell adhesion (GO:1903039)                    | 5.50E-07 |
|  | negative regulation of NF-kappaB transcription factor activity (GO:0032088)         | 8.84E-03 |
|  | inflammatory response (GO:0006954)                                                  | 6.90E-16 |
|  | regulation of glucose transmembrane transport (GO:0010827)                          | 1.87E-02 |
|  | regulation of response to oxidative stress (GO:1902882)                             | 8.33E-03 |
|  | negative regulation of synaptic transmission (GO:0050805)                           | 3.89E-02 |
|  | positive regulation of lipid localization (GO:1905954)                              | 3.56E-03 |
|  | response to molecule of bacterial origin (GO:0002237)                               | 1.97E-11 |
|  | regulation of synaptic transmission, glutamatergic (GO:0051966)                     | 1.43E-02 |
|  | regulation of tumor necrosis factor production (GO:0032680)                         | 4.88E-05 |
|  | mononuclear cell proliferation (GO:0032943)                                         | 6.00E-03 |
|  | positive regulation of reactive oxygen species metabolic process (GO:2000379)       | 1.17E-03 |
|  | positive regulation of T cell proliferation (GO:0042102)                            | 1.16E-03 |
|  | response to lipopolysaccharide (GO:0032496)                                         | 5.49E-12 |
|  | regulation of tyrosine phosphorylation of STAT protein (GO:0042509)                 | 5.26E-03 |
|  | lymphocyte proliferation (GO:0046651)                                               | 5.24E-03 |
|  | regulation of cytokine production involved in immune response (GO:0002718)          | 2.28E-03 |
|  | positive regulation of T cell differentiation (GO:0045582)                          | 2.15E-03 |
|  | cellular response to chemokine (GO:1990869)                                         | 2.14E-03 |
|  | response to chemokine (GO:1990868)                                                  | 2.13E-03 |
|  | regulation of tumor necrosis factor superfamily cytokine production (GO:1903555)    | 1.38E-05 |
|  | positive regulation of leukocyte migration (GO:0002687)                             | 3.27E-05 |
|  | negative regulation of chemotaxis (GO:0050922)                                      | 2.60E-02 |
|  | response to fungus (GO:0009620)                                                     | 2.59E-02 |
|  | positive regulation of cytokine production involved in immune response (GO:0002720) | 2.58E-02 |
|  | regulation of cellular response to oxidative stress (GO:1900407)                    | 4.59E-03 |
|  | response to interferon-gamma (GO:0034341)                                           | 3.92E-07 |
|  | leukocyte chemotaxis (GO:0030595)                                                   | 1.21E-05 |
|  | regulation of oxidative stress-induced cell death (GO:1903201)                      | 1.08E-02 |
|  | regulation of reactive oxygen species biosynthetic process (GO:1903426)             | 8.29E-04 |
|  | positive regulation of smooth muscle cell proliferation (GO:0048661)                | 1.87E-03 |
|  | positive regulation of wound healing (GO:0090303)                                   | 2.24E-02 |
|  | positive regulation of tumor necrosis factor production (GO:0032760)                | 1.61E-03 |
|  | leukocyte proliferation (GO:0070661)                                                | 6.29E-04 |
|  | myeloid leukocyte migration (GO:0097529)                                            | 1.65E-05 |

|  |                                                                                           |          |
|--|-------------------------------------------------------------------------------------------|----------|
|  | regulation of phagocytosis (GO:0050764)                                                   | 5.89E-04 |
|  | positive regulation of interleukin-1 production (GO:0032732)                              | 7.90E-03 |
|  | positive regulation of interleukin-6 production (GO:0032755)                              | 5.42E-04 |
|  | granulocyte migration (GO:0097530)                                                        | 2.27E-04 |
|  | positive regulation of interleukin-1 beta production (GO:0032731)                         | 1.81E-02 |
|  | neutrophil migration (GO:1990266)                                                         | 5.00E-04 |
|  | positive regulation of gliogenesis (GO:0014015)                                           | 7.28E-03 |
|  | regulation of interleukin-6 production (GO:0032675)                                       | 1.81E-06 |
|  | regulation of mononuclear cell migration (GO:0071675)                                     | 1.70E-02 |
|  | regulation of cytokine secretion (GO:0050707)                                             | 1.69E-02 |
|  | regulation of alpha-beta T cell activation (GO:0046634)                                   | 1.81E-04 |
|  | cellular response to biotic stimulus (GO:0071216)                                         | 2.99E-10 |
|  | positive regulation of tumor necrosis factor superfamily cytokine production (GO:1903557) | 4.26E-04 |
|  | regulation of interleukin-8 production (GO:0032677)                                       | 9.75E-04 |
|  | positive regulation of tyrosine phosphorylation of STAT protein (GO:0042531)              | 2.31E-03 |
|  | negative regulation of endothelial cell proliferation (GO:0001937)                        | 3.89E-02 |
|  | osteoclast differentiation (GO:0030316)                                                   | 3.88E-02 |
|  | cellular response to interferon-gamma (GO:0071346)                                        | 7.13E-08 |
|  | cellular response to molecule of bacterial origin (GO:0071219)                            | 1.21E-09 |
|  | regulation of interleukin-12 production (GO:0032655)                                      | 5.28E-03 |
|  | cellular response to lipopolysaccharide (GO:0071222)                                      | 5.76E-10 |
|  | interferon-gamma-mediated signaling pathway (GO:0060333)                                  | 5.97E-04 |
|  | neutrophil chemotaxis (GO:0030593)                                                        | 2.28E-04 |
|  | regulation of NIK/NF-kappaB signaling (GO:1901222)                                        | 3.10E-05 |
|  | positive regulation of reactive oxygen species biosynthetic process (GO:1903428)          | 4.09E-03 |
|  | positive regulation of NIK/NF-kappaB signaling (GO:1901224)                               | 1.55E-03 |
|  | positive regulation of phagocytosis (GO:0050766)                                          | 1.54E-03 |
|  | granulocyte chemotaxis (GO:0071621)                                                       | 7.65E-05 |
|  | leukocyte cell-cell adhesion (GO:0007159)                                                 | 3.71E-03 |
|  | regulation of interleukin-1 production (GO:0032652)                                       | 9.53E-06 |
|  | positive regulation of interleukin-12 production (GO:0032735)                             | 2.75E-02 |
|  | regulation of p38MAPK cascade (GO:1900744)                                                | 2.74E-02 |
|  | regulation of interferon-gamma production (GO:0032649)                                    | 3.13E-06 |
|  | regulation of CD4-positive, alpha-beta T cell activation (GO:2000514)                     | 1.30E-03 |
|  | negative regulation of blood vessel diameter (GO:0097756)                                 | 2.52E-02 |
|  | positive regulation of interferon-gamma production (GO:0032729)                           | 4.10E-04 |



|  |                                                                                           |          |
|--|-------------------------------------------------------------------------------------------|----------|
|  | regulation of lipid storage (GO:0010883)                                                  | 2.60E-03 |
|  | regulation of interleukin-1 beta production (GO:0032651)                                  | 1.20E-05 |
|  | positive regulation of interleukin-8 production (GO:0032757)                              | 8.22E-04 |
|  | regulation of T-helper cell differentiation (GO:0045622)                                  | 1.88E-02 |
|  | vasodilation (GO:0042311)                                                                 | 1.87E-02 |
|  | negative regulation of interleukin-1 production (GO:0032692)                              | 1.73E-02 |
|  | regulation of fatty acid transport (GO:2000191)                                           | 1.72E-02 |
|  | regulation of nitric oxide biosynthetic process (GO:0045428)                              | 2.15E-04 |
|  | positive regulation of alpha-beta T cell activation (GO:0046635)                          | 2.14E-04 |
|  | regulation of interleukin-10 production (GO:0032653)                                      | 6.16E-04 |
|  | purinergic nucleotide receptor signaling pathway (GO:0035590)                             | 1.75E-03 |
|  | detection of biotic stimulus (GO:0009595)                                                 | 1.58E-02 |
|  | MyD88-dependent toll-like receptor signaling pathway (GO:0002755)                         | 1.57E-02 |
|  | negative regulation of interleukin-6 production (GO:0032715)                              | 1.57E-03 |
|  | positive regulation of nitric oxide metabolic process (GO:1904407)                        | 1.42E-03 |
|  | negative regulation of cell junction assembly (GO:1901889)                                | 1.43E-02 |
|  | positive regulation of calcium-mediated signaling (GO:0050850)                            | 1.43E-02 |
|  | skeletal muscle cell differentiation (GO:0035914)                                         | 4.41E-04 |
|  | positive regulation of nitric oxide biosynthetic process (GO:0045429)                     | 1.28E-03 |
|  | regulation of cytokine production involved in inflammatory response (GO:1900015)          | 3.96E-04 |
|  | astrocyte differentiation (GO:0048708)                                                    | 1.22E-04 |
|  | regulation of macrophage activation (GO:0043030)                                          | 1.21E-04 |
|  | regulation of macrophage migration (GO:1905521)                                           | 1.16E-03 |
|  | positive regulation of interleukin-10 production (GO:0032733)                             | 3.30E-03 |
|  | protein kinase B signaling (GO:0043491)                                                   | 3.29E-03 |
|  | regulation of chemokine production (GO:0032642)                                           | 2.11E-07 |
|  | positive regulation of inflammatory response (GO:0050729)                                 | 5.94E-13 |
|  | regulation of CD4-positive, alpha-beta T cell differentiation (GO:0043370)                | 2.83E-04 |
|  | leukotriene metabolic process (GO:0006691)                                                | 2.95E-03 |
|  | regulation of icosanoid secretion (GO:0032303)                                            | 3.27E-02 |
|  | regulation of alpha-beta T cell differentiation (GO:0046637)                              | 6.29E-06 |
|  | negative regulation of interferon-gamma production (GO:0032689)                           | 8.08E-04 |
|  | negative regulation of interleukin-1 beta production (GO:0032691)                         | 8.71E-03 |
|  | positive regulation of interleukin-2 production (GO:0032743)                              | 2.28E-03 |
|  | positive regulation of cytokine production involved in inflammatory response (GO:1900017) | 2.89E-02 |
|  | astrocyte development (GO:0014002)                                                        | 6.32E-04 |

|  |                                                                                        |          |
|--|----------------------------------------------------------------------------------------|----------|
|  | positive regulation of p38MAPK cascade (GO:1900745)                                    | 7.63E-03 |
|  | neuroinflammatory response (GO:0150076)                                                | 1.76E-04 |
|  | positive regulation of T-helper cell differentiation (GO:0045624)                      | 2.54E-02 |
|  | detection of external biotic stimulus (GO:0098581)                                     | 2.53E-02 |
|  | positive regulation of alpha-beta T cell differentiation (GO:0046638)                  | 3.44E-05 |
|  | macrophage activation (GO:0042116)                                                     | 2.28E-06 |
|  | subpallium development (GO:0021544)                                                    | 5.82E-03 |
|  | regulation of nitric-oxide synthase biosynthetic process (GO:0051769)                  | 2.21E-02 |
|  | glial cell activation (GO:0061900)                                                     | 1.13E-04 |
|  | positive regulation of lipid storage (GO:0010884)                                      | 5.80E-03 |
|  | regulation of acute inflammatory response (GO:0002673)                                 | 7.05E-06 |
|  | positive regulation of CD4-positive, alpha-beta T cell activation (GO:2000516)         | 3.70E-04 |
|  | positive regulation of interleukin-4 production (GO:0032753)                           | 5.07E-03 |
|  | production of molecular mediator involved in inflammatory response (GO:0002532)        | 1.91E-02 |
|  | positive regulation of chemokine production (GO:0032722)                               | 3.42E-07 |
|  | macrophage migration (GO:1905517)                                                      | 1.90E-02 |
|  | astrocyte activation (GO:0048143)                                                      | 1.90E-02 |
|  | regulation of interleukin-2 production (GO:0032663)                                    | 7.57E-08 |
|  | leukocyte activation involved in inflammatory response (GO:0002269)                    | 2.76E-04 |
|  | microglial cell activation (GO:0001774)                                                | 2.74E-04 |
|  | positive regulation of oxidative stress-induced cell death (GO:1903209)                | 1.69E-02 |
|  | negative regulation of glucose transmembrane transport (GO:0010829)                    | 1.68E-02 |
|  | eosinophil migration (GO:0072677)                                                      | 1.68E-02 |
|  | regulation of interleukin-4 production (GO:0032673)                                    | 2.38E-04 |
|  | temperature homeostasis (GO:0001659)                                                   | 2.05E-04 |
|  | lipopolysaccharide-mediated signaling pathway (GO:0031663)                             | 4.42E-05 |
|  | detection of other organism (GO:0098543)                                               | 1.45E-02 |
|  | eosinophil chemotaxis (GO:0048245)                                                     | 1.45E-02 |
|  | regulation of glial cell migration (GO:1903975)                                        | 1.45E-02 |
|  | positive regulation of CD4-positive, alpha-beta T cell differentiation (GO:0043372)    | 1.74E-04 |
|  | regulation of neuroinflammatory response (GO:0150077)                                  | 3.76E-05 |
|  | positive regulation of nitric-oxide synthase biosynthetic process (GO:0051770)         | 1.22E-02 |
|  | negative regulation of interleukin-2 production (GO:0032703)                           | 1.19E-04 |
|  | striatum development (GO:0021756)                                                      | 2.23E-03 |
|  | macrophage activation involved in immune response (GO:0002281)                         | 1.02E-02 |
|  | regulation of granulocyte macrophage colony-stimulating factor production (GO:0032645) | 1.02E-02 |

|  |                                                                                                        |          |
|--|--------------------------------------------------------------------------------------------------------|----------|
|  | positive regulation of macrophage migration (GO:1905523)                                               | 9.87E-05 |
|  | cranial nerve structural organization (GO:0021604)                                                     | 4.59E-02 |
|  | negative regulation of sprouting angiogenesis (GO:1903671)                                             | 4.58E-02 |
|  | positive regulation of macrophage activation (GO:0043032)                                              | 8.08E-05 |
|  | positive regulation of monocyte chemotactic protein-1 production (GO:0071639)                          | 3.79E-02 |
|  | chemokine production (GO:0032602)                                                                      | 3.79E-02 |
|  | complement activation, alternative pathway (GO:0006957)                                                | 6.78E-03 |
|  | positive regulation of acute inflammatory response (GO:0002675)                                        | 1.13E-06 |
|  | regulation of apoptotic cell clearance (GO:2000425)                                                    | 3.03E-02 |
|  | diadenosine polyphosphate metabolic process (GO:0015959)                                               | 3.02E-02 |
|  | positive regulation of glial cell migration (GO:1903977)                                               | 4.33E-03 |
|  | positive regulation of apoptotic cell clearance (GO:2000427)                                           | 2.41E-02 |
|  | MHC protein complex assembly (GO:0002396)                                                              | 1.86E-02 |
|  | oncostatin-M-mediated signaling pathway (GO:0038165)                                                   | 1.85E-02 |
|  | regulation of heat generation (GO:0031650)                                                             | 6.96E-05 |
|  | positive regulation of neuroinflammatory response (GO:0150078)                                         | 6.91E-05 |
|  | cell junction disassembly (GO:0150146)                                                                 | 2.56E-03 |
|  | positive regulation of heat generation (GO:0031652)                                                    | 3.69E-04 |
|  | peptide antigen assembly with MHC protein complex (GO:0002501)                                         | 1.43E-02 |
|  | synapse pruning (GO:0098883)                                                                           | 1.90E-03 |
|  | regulation of microglial cell migration (GO:1904139)                                                   | 1.89E-03 |
|  | regulation of fever generation (GO:0031620)                                                            | 2.00E-04 |
|  | positive regulation of fever generation (GO:0031622)                                                   | 1.37E-03 |
|  | positive regulation of microglial cell migration (GO:1904141)                                          | 1.36E-03 |
|  | peptide antigen assembly with MHC class II protein complex (GO:0002503)                                | 6.77E-03 |
|  | MHC class II protein complex assembly (GO:0002399)                                                     | 6.75E-03 |
|  | leukotriene production involved in inflammatory response (GO:0002540)                                  | 4.98E-02 |
|  | arachidonic acid metabolite production involved in inflammatory response (GO:0002538)                  | 4.97E-02 |
|  | regulation of interleukin-3 production (GO:0032672)                                                    | 4.96E-02 |
|  | positive regulation of leukocyte adhesion to arterial endothelial cell (GO:1904999)                    | 4.96E-02 |
|  | positive regulation of cellular response to macrophage colony-stimulating factor stimulus (GO:1903974) | 4.95E-02 |
|  | positive regulation of response to macrophage colony-stimulating factor (GO:1903971)                   | 4.94E-02 |
|  | negative regulation of monocyte activation (GO:0150102)                                                | 4.93E-02 |
|  | negative regulation of polynucleotide adenylyltransferase activity (GO:1904246)                        | 4.92E-02 |
|  | detection of fungus (GO:0016046)                                                                       | 4.91E-02 |
|  | negative regulation of autophagic cell death (GO:1904093)                                              | 4.90E-02 |

**Supplemental Table 4.** Complete list of number of occurrences of each gene on the edges of the network diagram depicting upregulated KEGG pathways in hippocampal tissue from epileptic patients compared to controls.

| Gene     | Occurrences | Gene    | Occurrences | Gene       | Occurrences |
|----------|-------------|---------|-------------|------------|-------------|
| TNF      | 56          | MMP3    | 5           | BTG2       | 1           |
| NFKBIA   | 41          | HTR2A   | 5           | LAPTM5     | 1           |
| IL1B     | 36          | EGR2    | 4           | RPL23      | 1           |
| FOS      | 35          | SGK1    | 4           | PLCH1      | 1           |
| MYC      | 32          | MCL1    | 4           | CH25H      | 1           |
| HLA-DRB5 | 24          | CLDN10  | 4           | MIR222     | 1           |
| HLA-DRB1 | 24          | RARB    | 4           | DHRS9      | 1           |
| TLR4     | 24          | GLI1    | 4           | SEC24D     | 1           |
| HLA-DRA  | 24          | SLC17A6 | 4           | AP3B1      | 1           |
| HLA-DQA2 | 24          | SOD2    | 4           | SEMA3A     | 1           |
| HLA-DMB  | 24          | BCL2A1  | 4           | STEAP1     | 1           |
| GADD45B  | 23          | IL33    | 4           | CSGALNACT1 | 1           |
| GADD45G  | 22          | CSF2RA  | 4           | B3GNT5     | 1           |
| PTGS2    | 19          | HTR1D   | 4           | ABCA6      | 1           |
| GNB4     | 18          | TLR7    | 3           | SLC44A3    | 1           |
| TLR2     | 18          | PAH     | 3           | NCKAP1L    | 1           |
| SYK      | 15          | LIFR    | 3           | IRAK3      | 1           |
| C3       | 13          | CLEC7A  | 3           | GCNT4      | 1           |
| SOCS3    | 13          | CPB2    | 3           | AQP9       | 1           |
| CCL2     | 13          | SCIN    | 3           | RORB       | 1           |
| THBS1    | 12          | OSM     | 3           | SEMA3D     | 1           |
| CD86     | 12          | HRH1    | 3           | EPHA3      | 1           |
| CXCL1    | 11          | FPR1    | 3           | PLA2G7     | 1           |
| HK2      | 11          | ADORA3  | 3           | ALOX5AP    | 1           |
| IL18     | 11          | WEE1    | 2           | P2RY12     | 1           |
| BDKRB2   | 10          | HSD17B6 | 2           | SV2C       | 1           |
| CSF1R    | 10          | CFD     | 2           | MCHR2      | 1           |
| F2R      | 10          | CX3CR1  | 2           | GLP2R      | 1           |
| DRD1     | 10          | DOCK2   | 2           | NMU        | 1           |
| FCGR1A   | 10          | OLR1    | 2           | TAC3       | 1           |
| CASP1    | 9           | AQP4    | 2           | IRF8       | 1           |
| ADRB2    | 8           | STMN1   | 2           | VSIG4      | 1           |
| CXCL3    | 8           | HTR3B   | 2           | CD33       | 1           |
| CYBB     | 8           | FCAR    | 2           | LILRB4     | 1           |

|           |   |          |   |           |   |
|-----------|---|----------|---|-----------|---|
| IL6ST     | 7 | RXFP1    | 2 | NR4A3     | 1 |
| CCL3      | 7 | APBB1IP  | 2 | TREM2     | 1 |
| MEF2C     | 7 | PRKD3    | 2 | NFKBIZ    | 1 |
| EGR1      | 6 | CFB      | 2 | KDM6A     | 1 |
| EDNRB     | 6 | PLD4     | 2 | S100A9    | 1 |
| KCNQ1     | 6 | ST6GAL1  | 2 | PYDC2     | 1 |
| C1QB      | 6 | ST6GAL2  | 2 | GBP1      | 1 |
| SELE      | 6 | SPTLC3   | 2 | TNFRSF10D | 1 |
| EIF4E     | 6 | SLC1A3   | 2 | IL1RN     | 1 |
| C1QA      | 6 | GRIK3    | 2 | TNFSF18   | 1 |
| NPY       | 5 | IL25     | 2 | CYP4F2    | 1 |
| NCF2      | 5 | CHRNA3   | 2 | CYP4F3    | 1 |
| ALOX5     | 5 | S1PR3    | 2 | PPM1B     | 1 |
| FOSB      | 5 | PPBP     | 2 | SUCNR1    | 1 |
| HPGDS     | 5 | SPINT1   | 2 | MSR1      | 1 |
| TNC       | 5 | TTN      | 2 | ZFP37     | 1 |
| EFNA5     | 5 | IRAK2    | 2 | DPP4      | 1 |
| NR4A1     | 5 | ZFP36    | 2 | SLC7A7    | 1 |
| LPAR5     | 5 | CCL8     | 2 | SLC7A11   | 1 |
| TNFRSF11A | 5 | EPB41L4B | 1 | OR2L13    | 1 |
